# Supplementary material for: Selenium Accumulating Leafy Vegetables Are a Potential Source of Functional Foods
Source: Int J Food Sci. 2015 Dec 10;2015:549676. doi: 10.1155/2015/549676 (PMC4756630; doi:10.1155/2015/549676)
Supplement: Supplementary file 1 — Statistical analyses (Table S1) indicated that the difference in selenium uptake of leaves was significant only in between C. maxima and Amaranthus sp (p<0.01), but not the other plants. For the stem samples, the difference in selenium uptake was statistically significant between V. unguiculata and Amaranthus sp for early harvested samples (p<0.05) and between C. maxima and Amaranthus sp (p<0.01) for late harvested stems. [file 549676.f1.doc]

<?xml version="1.0" encoding="UTF-8" standalone="yes"?>
<?mso-application progid="Word.Document"?>
<w:wordDocument xmlns:aml="http://schemas.microsoft.com/aml/2001/core" xmlns:wpc="http://schemas.microsoft.com/office/word/2010/wordprocessingCanvas" xmlns:dt="uuid:C2F41010-65B3-11d1-A29F-00AA00C14882" xmlns:mc="http://schemas.openxmlformats.org/markup-compatibility/2006" xmlns:o="urn:schemas-microsoft-com:office:office" xmlns:v="urn:schemas-microsoft-com:vml" xmlns:w10="urn:schemas-microsoft-com:office:word" xmlns:w="http://schemas.microsoft.com/office/word/2003/wordml" xmlns:wx="http://schemas.microsoft.com/office/word/2003/auxHint" xmlns:wne="http://schemas.microsoft.com/office/word/2006/wordml" xmlns:wsp="http://schemas.microsoft.com/office/word/2003/wordml/sp2" xmlns:sl="http://schemas.microsoft.com/schemaLibrary/2003/core" w:macrosPresent="no" w:embeddedObjPresent="no" w:ocxPresent="no" xml:space="preserve"><w:ignoreSubtree w:val="http://schemas.microsoft.com/office/word/2003/wordml/sp2"/><o:DocumentProperties><o:Author>Mate Erdelyi</o:Author><o:LastAuthor>Stephen</o:LastAuthor><o:Revision>2</o:Revision><o:TotalTime>1</o:TotalTime><o:LastPrinted>2015-07-18T13:44:00Z</o:LastPrinted><o:Created>2015-07-18T14:07:00Z</o:Created><o:LastSaved>2015-07-18T14:07:00Z</o:LastSaved><o:Pages>1</o:Pages><o:Words>299</o:Words><o:Characters>1589</o:Characters><o:Lines>13</o:Lines><o:Paragraphs>3</o:Paragraphs><o:CharactersWithSpaces>1885</o:CharactersWithSpaces><o:Version>14</o:Version></o:DocumentProperties><w:fonts><w:defaultFonts w:ascii="Calibri" w:fareast="Calibri" w:h-ansi="Calibri" w:cs="Times New Roman"/><w:font w:name="Times New Roman"><w:panose-1 w:val="02020603050405020304"/><w:charset w:val="00"/><w:family w:val="Roman"/><w:pitch w:val="variable"/><w:sig w:usb-0="E0002AFF" w:usb-1="C0007841" w:usb-2="00000009" w:usb-3="00000000" w:csb-0="000001FF" w:csb-1="00000000"/></w:font><w:font w:name="Cambria Math"><w:panose-1 w:val="02040503050406030204"/><w:charset w:val="00"/><w:family w:val="Roman"/><w:pitch w:val="variable"/><w:sig w:usb-0="E00002FF" w:usb-1="420024FF" w:usb-2="00000000" w:usb-3="00000000" w:csb-0="0000019F" w:csb-1="00000000"/></w:font><w:font w:name="Calibri"><w:panose-1 w:val="020F0502020204030204"/><w:charset w:val="00"/><w:family w:val="Swiss"/><w:pitch w:val="variable"/><w:sig w:usb-0="E00002FF" w:usb-1="4000ACFF" w:usb-2="00000001" w:usb-3="00000000" w:csb-0="0000019F" w:csb-1="00000000"/></w:font></w:fonts><w:styles><w:versionOfBuiltInStylenames w:val="7"/><w:latentStyles w:defLockedState="off" w:latentStyleCount="267"><w:lsdException w:name="Normal"/><w:lsdException w:name="heading 1"/><w:lsdException w:name="heading 2"/><w:lsdException w:name="heading 3"/><w:lsdException w:name="heading 4"/><w:lsdException w:name="heading 5"/><w:lsdException w:name="heading 6"/><w:lsdException w:name="heading 7"/><w:lsdException w:name="heading 8"/><w:lsdException w:name="heading 9"/><w:lsdException w:name="toc 1"/><w:lsdException w:name="toc 2"/><w:lsdException w:name="toc 3"/><w:lsdException w:name="toc 4"/><w:lsdException w:name="toc 5"/><w:lsdException w:name="toc 6"/><w:lsdException w:name="toc 7"/><w:lsdException w:name="toc 8"/><w:lsdException w:name="toc 9"/><w:lsdException w:name="caption"/><w:lsdException w:name="Title"/><w:lsdException w:name="Default Paragraph Font"/><w:lsdException w:name="Subtitle"/><w:lsdException w:name="Strong"/><w:lsdException w:name="Emphasis"/><w:lsdException w:name="Table Grid"/><w:lsdException w:name="Placeholder Text"/><w:lsdException w:name="No Spacing"/><w:lsdException w:name="Light Shading"/><w:lsdException w:name="Light List"/><w:lsdException w:name="Light Grid"/><w:lsdException w:name="Medium Shading 1"/><w:lsdException w:name="Medium Shading 2"/><w:lsdException w:name="Medium List 1"/><w:lsdException w:name="Medium List 2"/><w:lsdException w:name="Medium Grid 1"/><w:lsdException w:name="Medium Grid 2"/><w:lsdException w:name="Medium Grid 3"/><w:lsdException w:name="Dark List"/><w:lsdException w:name="Colorful Shading"/><w:lsdException w:name="Colorful List"/><w:lsdException w:name="Colorful Grid"/><w:lsdException w:name="Light Shading Accent 1"/><w:lsdException w:name="Light List Accent 1"/><w:lsdException w:name="Light Grid Accent 1"/><w:lsdException w:name="Medium Shading 1 Accent 1"/><w:lsdException w:name="Medium Shading 2 Accent 1"/><w:lsdException w:name="Medium List 1 Accent 1"/><w:lsdException w:name="Revision"/><w:lsdException w:name="List Paragraph"/><w:lsdException w:name="Quote"/><w:lsdException w:name="Intense Quote"/><w:lsdException w:name="Medium List 2 Accent 1"/><w:lsdException w:name="Medium Grid 1 Accent 1"/><w:lsdException w:name="Medium Grid 2 Accent 1"/><w:lsdException w:name="Medium Grid 3 Accent 1"/><w:lsdException w:name="Dark List Accent 1"/><w:lsdException w:name="Colorful Shading Accent 1"/><w:lsdException w:name="Colorful List Accent 1"/><w:lsdException w:name="Colorful Grid Accent 1"/><w:lsdException w:name="Light Shading Accent 2"/><w:lsdException w:name="Light List Accent 2"/><w:lsdException w:name="Light Grid Accent 2"/><w:lsdException w:name="Medium Shading 1 Accent 2"/><w:lsdException w:name="Medium Shading 2 Accent 2"/><w:lsdException w:name="Medium List 1 Accent 2"/><w:lsdException w:name="Medium List 2 Accent 2"/><w:lsdException w:name="Medium Grid 1 Accent 2"/><w:lsdException w:name="Medium Grid 2 Accent 2"/><w:lsdException w:name="Medium Grid 3 Accent 2"/><w:lsdException w:name="Dark List Accent 2"/><w:lsdException w:name="Colorful Shading Accent 2"/><w:lsdException w:name="Colorful List Accent 2"/><w:lsdException w:name="Colorful Grid Accent 2"/><w:lsdException w:name="Light Shading Accent 3"/><w:lsdException w:name="Light List Accent 3"/><w:lsdException w:name="Light Grid Accent 3"/><w:lsdException w:name="Medium Shading 1 Accent 3"/><w:lsdException w:name="Medium Shading 2 Accent 3"/><w:lsdException w:name="Medium List 1 Accent 3"/><w:lsdException w:name="Medium List 2 Accent 3"/><w:lsdException w:name="Medium Grid 1 Accent 3"/><w:lsdException w:name="Medium Grid 2 Accent 3"/><w:lsdException w:name="Medium Grid 3 Accent 3"/><w:lsdException w:name="Dark List Accent 3"/><w:lsdException w:name="Colorful Shading Accent 3"/><w:lsdException w:name="Colorful List Accent 3"/><w:lsdException w:name="Colorful Grid Accent 3"/><w:lsdException w:name="Light Shading Accent 4"/><w:lsdException w:name="Light List Accent 4"/><w:lsdException w:name="Light Grid Accent 4"/><w:lsdException w:name="Medium Shading 1 Accent 4"/><w:lsdException w:name="Medium Shading 2 Accent 4"/><w:lsdException w:name="Medium List 1 Accent 4"/><w:lsdException w:name="Medium List 2 Accent 4"/><w:lsdException w:name="Medium Grid 1 Accent 4"/><w:lsdException w:name="Medium Grid 2 Accent 4"/><w:lsdException w:name="Medium Grid 3 Accent 4"/><w:lsdException w:name="Dark List Accent 4"/><w:lsdException w:name="Colorful Shading Accent 4"/><w:lsdException w:name="Colorful List Accent 4"/><w:lsdException w:name="Colorful Grid Accent 4"/><w:lsdException w:name="Light Shading Accent 5"/><w:lsdException w:name="Light List Accent 5"/><w:lsdException w:name="Light Grid Accent 5"/><w:lsdException w:name="Medium Shading 1 Accent 5"/><w:lsdException w:name="Medium Shading 2 Accent 5"/><w:lsdException w:name="Medium List 1 Accent 5"/><w:lsdException w:name="Medium List 2 Accent 5"/><w:lsdException w:name="Medium Grid 1 Accent 5"/><w:lsdException w:name="Medium Grid 2 Accent 5"/><w:lsdException w:name="Medium Grid 3 Accent 5"/><w:lsdException w:name="Dark List Accent 5"/><w:lsdException w:name="Colorful Shading Accent 5"/><w:lsdException w:name="Colorful List Accent 5"/><w:lsdException w:name="Colorful Grid Accent 5"/><w:lsdException w:name="Light Shading Accent 6"/><w:lsdException w:name="Light List Accent 6"/><w:lsdException w:name="Light Grid Accent 6"/><w:lsdException w:name="Medium Shading 1 Accent 6"/><w:lsdException w:name="Medium Shading 2 Accent 6"/><w:lsdException w:name="Medium List 1 Accent 6"/><w:lsdException w:name="Medium List 2 Accent 6"/><w:lsdException w:name="Medium Grid 1 Accent 6"/><w:lsdException w:name="Medium Grid 2 Accent 6"/><w:lsdException w:name="Medium Grid 3 Accent 6"/><w:lsdException w:name="Dark List Accent 6"/><w:lsdException w:name="Colorful Shading Accent 6"/><w:lsdException w:name="Colorful List Accent 6"/><w:lsdException w:name="Colorful Grid Accent 6"/><w:lsdException w:name="Subtle Emphasis"/><w:lsdException w:name="Intense Emphasis"/><w:lsdException w:name="Subtle Reference"/><w:lsdException w:name="Intense Reference"/><w:lsdException w:name="Book Title"/><w:lsdException w:name="Bibliography"/><w:lsdException w:name="TOC Heading"/></w:latentStyles><w:style w:type="paragraph" w:default="on" w:styleId="Normal"><w:name w:val="Normal"/><w:rsid w:val="005B5E1E"/><w:pPr><w:spacing w:line="340" w:line-rule="at-least"/><w:jc w:val="both"/></w:pPr><w:rPr><w:rFonts w:ascii="Times New Roman" w:fareast="Times New Roman" w:h-ansi="Times New Roman"/><wx:font wx:val="Times New Roman"/><w:color w:val="000000"/><w:sz w:val="24"/><w:lang w:val="EN-US" w:fareast="DE" w:bidi="AR-SA"/></w:rPr></w:style><w:style w:type="character" w:default="on" w:styleId="DefaultParagraphFont"><w:name w:val="Default Paragraph Font"/></w:style><w:style w:type="table" w:default="on" w:styleId="TableNormal"><w:name w:val="Normal Table"/><wx:uiName wx:val="Table Normal"/><w:rPr><wx:font wx:val="Calibri"/><w:lang w:val="SV" w:fareast="SV" w:bidi="AR-SA"/></w:rPr><w:tblPr><w:tblInd w:w="0" w:type="dxa"/><w:tblCellMar><w:top w:w="0" w:type="dxa"/><w:left w:w="108" w:type="dxa"/><w:bottom w:w="0" w:type="dxa"/><w:right w:w="108" w:type="dxa"/></w:tblCellMar></w:tblPr></w:style><w:style w:type="list" w:default="on" w:styleId="NoList"><w:name w:val="No List"/></w:style><w:style w:type="paragraph" w:styleId="Header"><w:name w:val="header"/><wx:uiName wx:val="Header"/><w:basedOn w:val="Normal"/><w:link w:val="HeaderChar"/><w:rsid w:val="009860D5"/><w:pPr><w:tabs><w:tab w:val="center" w:pos="4536"/><w:tab w:val="right" w:pos="9072"/></w:tabs><w:spacing w:line="240" w:line-rule="auto"/></w:pPr><w:rPr><wx:font wx:val="Times New Roman"/></w:rPr></w:style><w:style w:type="character" w:styleId="HeaderChar"><w:name w:val="Header Char"/><w:link w:val="Header"/><w:rsid w:val="009860D5"/><w:rPr><w:rFonts w:ascii="Times New Roman" w:fareast="Times New Roman" w:h-ansi="Times New Roman" w:cs="Times New Roman"/><w:color w:val="000000"/><w:sz w:val="24"/><w:sz-cs w:val="20"/><w:lang w:val="EN-US" w:fareast="DE"/></w:rPr></w:style><w:style w:type="paragraph" w:styleId="Footer"><w:name w:val="footer"/><wx:uiName wx:val="Footer"/><w:basedOn w:val="Normal"/><w:link w:val="FooterChar"/><w:rsid w:val="009860D5"/><w:pPr><w:tabs><w:tab w:val="center" w:pos="4536"/><w:tab w:val="right" w:pos="9072"/></w:tabs><w:spacing w:line="240" w:line-rule="auto"/></w:pPr><w:rPr><wx:font wx:val="Times New Roman"/></w:rPr></w:style><w:style w:type="character" w:styleId="FooterChar"><w:name w:val="Footer Char"/><w:link w:val="Footer"/><w:rsid w:val="009860D5"/><w:rPr><w:rFonts w:ascii="Times New Roman" w:fareast="Times New Roman" w:h-ansi="Times New Roman" w:cs="Times New Roman"/><w:color w:val="000000"/><w:sz w:val="24"/><w:sz-cs w:val="20"/><w:lang w:val="EN-US" w:fareast="DE"/></w:rPr></w:style></w:styles><w:shapeDefaults><o:shapedefaults v:ext="edit" spidmax="1026"/><o:shapelayout v:ext="edit"><o:idmap v:ext="edit" data="1"/></o:shapelayout></w:shapeDefaults><w:docPr><w:view w:val="print"/><w:zoom w:percent="84"/><w:doNotEmbedSystemFonts/><w:defaultTabStop w:val="1304"/><w:hyphenationZone w:val="425"/><w:punctuationKerning/><w:characterSpacingControl w:val="DontCompress"/><w:optimizeForBrowser/><w:allowPNG/><w:validateAgainstSchema/><w:saveInvalidXML w:val="off"/><w:ignoreMixedContent w:val="off"/><w:alwaysShowPlaceholderText w:val="off"/><w:footnotePr><w:footnote w:type="separator"><w:p wsp:rsidR="00590C2F" wsp:rsidRDefault="00590C2F" wsp:rsidP="009860D5"><w:pPr><w:spacing w:line="240" w:line-rule="auto"/></w:pPr><w:r><w:separator/></w:r></w:p></w:footnote><w:footnote w:type="continuation-separator"><w:p wsp:rsidR="00590C2F" wsp:rsidRDefault="00590C2F" wsp:rsidP="009860D5"><w:pPr><w:spacing w:line="240" w:line-rule="auto"/></w:pPr><w:r><w:continuationSeparator/></w:r></w:p></w:footnote></w:footnotePr><w:endnotePr><w:endnote w:type="separator"><w:p wsp:rsidR="00590C2F" wsp:rsidRDefault="00590C2F" wsp:rsidP="009860D5"><w:pPr><w:spacing w:line="240" w:line-rule="auto"/></w:pPr><w:r><w:separator/></w:r></w:p></w:endnote><w:endnote w:type="continuation-separator"><w:p wsp:rsidR="00590C2F" wsp:rsidRDefault="00590C2F" wsp:rsidP="009860D5"><w:pPr><w:spacing w:line="240" w:line-rule="auto"/></w:pPr><w:r><w:continuationSeparator/></w:r></w:p></w:endnote></w:endnotePr><w:compat><w:breakWrappedTables/><w:snapToGridInCell/><w:wrapTextWithPunct/><w:useAsianBreakRules/><w:dontGrowAutofit/></w:compat><wsp:rsids><wsp:rsidRoot wsp:val="005B5E1E"/><wsp:rsid wsp:val="00332346"/><wsp:rsid wsp:val="004471FC"/><wsp:rsid wsp:val="00577B9C"/><wsp:rsid wsp:val="00590C2F"/><wsp:rsid wsp:val="00591655"/><wsp:rsid wsp:val="005B5E1E"/><wsp:rsid wsp:val="006C0AF5"/><wsp:rsid wsp:val="009860D5"/><wsp:rsid wsp:val="00A23B33"/><wsp:rsid wsp:val="00A4228D"/><wsp:rsid wsp:val="00C6726F"/><wsp:rsid wsp:val="00E8065B"/></wsp:rsids></w:docPr><w:body><wx:sect><w:p wsp:rsidR="009860D5" wsp:rsidRDefault="009860D5" wsp:rsidP="009860D5"><w:pPr><w:rPr><w:b/><w:lang w:fareast="EN-US"/></w:rPr></w:pPr></w:p><w:p wsp:rsidR="009860D5" wsp:rsidRDefault="009860D5" wsp:rsidP="009860D5"><w:pPr><w:jc w:val="left"/><w:rPr><w:b/><w:sz w:val="36"/></w:rPr></w:pPr><w:r wsp:rsidRPr="002D1F73"><w:rPr><w:b/><w:sz w:val="36"/></w:rPr><w:t>Selenium </w:t></w:r><w:r><w:rPr><w:b/><w:sz w:val="36"/></w:rPr><w:t>A</w:t></w:r><w:r wsp:rsidRPr="002D1F73"><w:rPr><w:b/><w:sz w:val="36"/></w:rPr><w:t>ccumulating Leafy Vegetables</w:t></w:r><w:r><w:rPr><w:b/><w:sz w:val="36"/></w:rPr><w:t> are</w:t></w:r><w:r wsp:rsidRPr="002D1F73"><w:rPr><w:b/><w:sz w:val="36"/></w:rPr><w:t> Potential Source of Functional Foods</w:t></w:r></w:p><w:p wsp:rsidR="009860D5" wsp:rsidRPr="002D1F73" wsp:rsidRDefault="009860D5" wsp:rsidP="009860D5"><w:pPr><w:jc w:val="left"/><w:rPr><w:b/><w:sz w:val="36"/></w:rPr></w:pPr></w:p><w:p wsp:rsidR="009860D5" wsp:rsidRPr="002D1F73" wsp:rsidRDefault="009860D5" wsp:rsidP="009860D5"><w:pPr><w:spacing w:before="240" w:after="240"/><w:jc w:val="left"/><w:rPr><w:b/><w:vertAlign w:val="superscript"/></w:rPr></w:pPr><w:r wsp:rsidRPr="002D1F73"><w:rPr><w:b/></w:rPr><w:t>Petro E. Mabeyo,</w:t></w:r><w:r><w:rPr><w:b/></w:rPr><w:t> </w:t></w:r><w:r wsp:rsidRPr="002D1F73"><w:rPr><w:b/></w:rPr><w:t>Mkabwa L.K. Manoko, Amra Gruhonjic, Paul </w:t></w:r><w:r><w:rPr><w:b/></w:rPr><w:t>A. Fitzpatrick</w:t></w:r><w:r wsp:rsidRPr="002D1F73"><w:rPr><w:b/></w:rPr><w:t>, Göran Landberg, Máté Erdélyi</w:t></w:r><w:r wsp:rsidRPr="000C472E"><w:rPr><w:b/></w:rPr><w:t>,</w:t></w:r><w:r wsp:rsidRPr="00847EAB"><w:rPr><w:b/></w:rPr><w:t> </w:t></w:r><w:r wsp:rsidRPr="002D1F73"><w:rPr><w:b/></w:rPr><w:t>and Stephen S. Nyandoro</w:t></w:r></w:p><w:p wsp:rsidR="009860D5" wsp:rsidRDefault="009860D5" wsp:rsidP="009860D5"><w:pPr><w:rPr><w:b/><w:lang w:fareast="EN-US"/></w:rPr></w:pPr></w:p><w:p wsp:rsidR="009860D5" wsp:rsidRDefault="009860D5" wsp:rsidP="009860D5"><w:pPr><w:rPr><w:b/><w:lang w:fareast="EN-US"/></w:rPr></w:pPr></w:p><w:p wsp:rsidR="005B5E1E" wsp:rsidRPr="00253CB8" wsp:rsidRDefault="005B5E1E" wsp:rsidP="009860D5"><w:pPr><w:rPr><w:lang w:fareast="EN-US"/></w:rPr></w:pPr><w:r wsp:rsidRPr="0069366D"><w:rPr><w:b/><w:lang w:fareast="EN-US"/></w:rPr><w:t>Table </w:t></w:r><w:r wsp:rsidR="009860D5"><w:rPr><w:b/><w:lang w:fareast="EN-US"/></w:rPr><w:t>S1</w:t></w:r><w:r><w:rPr><w:b/><w:lang w:fareast="EN-US"/></w:rPr><w:t>.</w:t></w:r><w:r wsp:rsidRPr="0069366D"><w:rPr><w:b/><w:lang w:fareast="EN-US"/></w:rPr><w:t> </w:t></w:r><w:r wsp:rsidRPr="00253CB8"><w:rPr><w:lang w:fareast="EN-US"/></w:rPr><w:t>Kruskal-Wallis </w:t></w:r><w:r><w:rPr><w:lang w:fareast="EN-US"/></w:rPr><w:t>Statistical </w:t></w:r><w:r wsp:rsidRPr="00253CB8"><w:rPr><w:lang w:fareast="EN-US"/></w:rPr><w:t>Test for </w:t></w:r><w:r><w:rPr><w:lang w:fareast="EN-US"/></w:rPr><w:t>the Selenium Uptake of Selected </w:t></w:r><w:r wsp:rsidRPr="00253CB8"><w:rPr><w:lang w:fareast="EN-US"/></w:rPr><w:t>Vegetable Samples </w:t></w:r></w:p><w:tbl><w:tblPr><w:tblW w:w="9403" w:type="dxa"/><w:jc w:val="center"/><w:tblBorders><w:top w:val="single" w:sz="4" wx:bdrwidth="10" w:space="0" w:color="auto"/><w:bottom w:val="single" w:sz="4" wx:bdrwidth="10" w:space="0" w:color="auto"/></w:tblBorders><w:tblLayout w:type="Fixed"/><w:tblLook w:val="04A0"/></w:tblPr><w:tblGrid><w:gridCol w:w="1463"/><w:gridCol w:w="1134"/><w:gridCol w:w="851"/><w:gridCol w:w="1134"/><w:gridCol w:w="850"/><w:gridCol w:w="1134"/><w:gridCol w:w="851"/><w:gridCol w:w="1134"/><w:gridCol w:w="852"/></w:tblGrid><w:tr wsp:rsidR="005B5E1E" wsp:rsidRPr="00E85685" wsp:rsidTr="00EB653E"><w:trPr><w:tblHeader/><w:jc w:val="center"/></w:trPr><w:tc><w:tcPr><w:tcW w:w="1463" w:type="dxa"/><w:vmerge w:val="restart"/></w:tcPr><w:p wsp:rsidR="005B5E1E" wsp:rsidRPr="00E85685" wsp:rsidRDefault="005B5E1E" wsp:rsidP="00EB653E"><w:pPr><w:rPr><w:sz w:val="20"/><w:lang w:fareast="EN-US"/></w:rPr></w:pPr><w:r wsp:rsidRPr="00E85685"><w:rPr><w:sz w:val="20"/><w:lang w:fareast="EN-US"/></w:rPr><w:t>Dunn’s Multiple Comparison</w:t></w:r></w:p></w:tc><w:tc><w:tcPr><w:tcW w:w="1985" w:type="dxa"/><w:gridSpan w:val="2"/><w:tcBorders><w:bottom w:val="single" w:sz="4" wx:bdrwidth="10" w:space="0" w:color="auto"/></w:tcBorders></w:tcPr><w:p wsp:rsidR="005B5E1E" wsp:rsidRPr="00E85685" wsp:rsidRDefault="005B5E1E" wsp:rsidP="00EB653E"><w:pPr><w:rPr><w:sz w:val="20"/><w:lang w:fareast="EN-US"/></w:rPr></w:pPr><w:r wsp:rsidRPr="00E85685"><w:rPr><w:sz w:val="20"/><w:lang w:fareast="EN-US"/></w:rPr><w:t>Early Leaf Harvest (KW=18.276)</w:t></w:r></w:p></w:tc><w:tc><w:tcPr><w:tcW w:w="1984" w:type="dxa"/><w:gridSpan w:val="2"/><w:tcBorders><w:bottom w:val="single" w:sz="4" wx:bdrwidth="10" w:space="0" w:color="auto"/></w:tcBorders></w:tcPr><w:p wsp:rsidR="005B5E1E" wsp:rsidRPr="00E85685" wsp:rsidRDefault="005B5E1E" wsp:rsidP="00EB653E"><w:pPr><w:rPr><w:sz w:val="20"/><w:lang w:fareast="EN-US"/></w:rPr></w:pPr><w:r wsp:rsidRPr="00E85685"><w:rPr><w:sz w:val="20"/><w:lang w:fareast="EN-US"/></w:rPr><w:t>Late Leaf Harvest </w:t></w:r></w:p><w:p wsp:rsidR="005B5E1E" wsp:rsidRPr="00E85685" wsp:rsidRDefault="005B5E1E" wsp:rsidP="00EB653E"><w:pPr><w:ind w:first-line="284"/><w:rPr><w:sz w:val="20"/><w:lang w:fareast="EN-US"/></w:rPr></w:pPr><w:r wsp:rsidRPr="00E85685"><w:rPr><w:sz w:val="20"/><w:lang w:fareast="EN-US"/></w:rPr><w:t>(KW = 18.355)</w:t></w:r></w:p></w:tc><w:tc><w:tcPr><w:tcW w:w="1985" w:type="dxa"/><w:gridSpan w:val="2"/><w:tcBorders><w:bottom w:val="single" w:sz="4" wx:bdrwidth="10" w:space="0" w:color="auto"/></w:tcBorders></w:tcPr><w:p wsp:rsidR="005B5E1E" wsp:rsidRPr="00E85685" wsp:rsidRDefault="005B5E1E" wsp:rsidP="00EB653E"><w:pPr><w:rPr><w:sz w:val="20"/><w:lang w:fareast="EN-US"/></w:rPr></w:pPr><w:r wsp:rsidRPr="00E85685"><w:rPr><w:sz w:val="20"/><w:lang w:fareast="EN-US"/></w:rPr><w:t>Early Stem Harvest </w:t></w:r></w:p><w:p wsp:rsidR="005B5E1E" wsp:rsidRPr="00E85685" wsp:rsidRDefault="005B5E1E" wsp:rsidP="00EB653E"><w:pPr><w:ind w:first-line="284"/><w:rPr><w:sz w:val="20"/><w:lang w:fareast="EN-US"/></w:rPr></w:pPr><w:r wsp:rsidRPr="00E85685"><w:rPr><w:sz w:val="20"/><w:lang w:val="EN-GB" w:fareast="EN-US"/></w:rPr><w:t>(</w:t></w:r><w:r wsp:rsidRPr="00E85685"><w:rPr><w:sz w:val="20"/><w:lang w:fareast="EN-US"/></w:rPr><w:t>KW</w:t></w:r><w:r wsp:rsidRPr="00E85685"><w:rPr><w:sz w:val="20"/><w:lang w:val="EN-GB" w:fareast="EN-US"/></w:rPr><w:t> = </w:t></w:r><w:r wsp:rsidRPr="00E85685"><w:rPr><w:sz w:val="20"/><w:lang w:fareast="EN-US"/></w:rPr><w:t>17.882)</w:t></w:r></w:p></w:tc><w:tc><w:tcPr><w:tcW w:w="1986" w:type="dxa"/><w:gridSpan w:val="2"/><w:tcBorders><w:bottom w:val="single" w:sz="4" wx:bdrwidth="10" w:space="0" w:color="auto"/></w:tcBorders></w:tcPr><w:p wsp:rsidR="005B5E1E" wsp:rsidRPr="00E85685" wsp:rsidRDefault="005B5E1E" wsp:rsidP="00EB653E"><w:pPr><w:rPr><w:sz w:val="20"/><w:lang w:fareast="EN-US"/></w:rPr></w:pPr><w:r wsp:rsidRPr="00E85685"><w:rPr><w:sz w:val="20"/><w:lang w:fareast="EN-US"/></w:rPr><w:t>Late Stem Harvest </w:t></w:r></w:p><w:p wsp:rsidR="005B5E1E" wsp:rsidRPr="00E85685" wsp:rsidRDefault="005B5E1E" wsp:rsidP="00EB653E"><w:pPr><w:ind w:first-line="284"/><w:rPr><w:sz w:val="20"/><w:lang w:fareast="EN-US"/></w:rPr></w:pPr><w:r wsp:rsidRPr="00E85685"><w:rPr><w:sz w:val="20"/><w:lang w:fareast="EN-US"/></w:rPr><w:t>(KW = 18.782)</w:t></w:r></w:p></w:tc></w:tr><w:tr wsp:rsidR="005B5E1E" wsp:rsidRPr="00E85685" wsp:rsidTr="00EB653E"><w:trPr><w:tblHeader/><w:jc w:val="center"/></w:trPr><w:tc><w:tcPr><w:tcW w:w="1463" w:type="dxa"/><w:vmerge/><w:tcBorders><w:bottom w:val="single" w:sz="4" wx:bdrwidth="10" w:space="0" w:color="auto"/></w:tcBorders></w:tcPr><w:p wsp:rsidR="005B5E1E" wsp:rsidRPr="00E85685" wsp:rsidRDefault="005B5E1E" wsp:rsidP="00EB653E"><w:pPr><w:ind w:first-line="284"/><w:rPr><w:sz w:val="20"/><w:lang w:fareast="EN-US"/></w:rPr></w:pPr></w:p></w:tc><w:tc><w:tcPr><w:tcW w:w="1134" w:type="dxa"/><w:tcBorders><w:top w:val="single" w:sz="4" wx:bdrwidth="10" w:space="0" w:color="auto"/><w:bottom w:val="single" w:sz="4" wx:bdrwidth="10" w:space="0" w:color="auto"/></w:tcBorders></w:tcPr><w:p wsp:rsidR="005B5E1E" wsp:rsidRPr="00E85685" wsp:rsidRDefault="005B5E1E" wsp:rsidP="00EB653E"><w:pPr><w:rPr><w:sz w:val="20"/><w:lang w:fareast="EN-US"/></w:rPr></w:pPr><w:r wsp:rsidRPr="00E85685"><w:rPr><w:sz w:val="20"/><w:lang w:fareast="EN-US"/></w:rPr><w:t>Difference</w:t></w:r></w:p></w:tc><w:tc><w:tcPr><w:tcW w:w="851" w:type="dxa"/><w:tcBorders><w:top w:val="single" w:sz="4" wx:bdrwidth="10" w:space="0" w:color="auto"/><w:bottom w:val="single" w:sz="4" wx:bdrwidth="10" w:space="0" w:color="auto"/></w:tcBorders></w:tcPr><w:p wsp:rsidR="005B5E1E" wsp:rsidRPr="00E85685" wsp:rsidRDefault="005B5E1E" wsp:rsidP="00EB653E"><w:pPr><w:rPr><w:sz w:val="20"/><w:lang w:fareast="EN-US"/></w:rPr></w:pPr><w:r wsp:rsidRPr="00E85685"><w:rPr><w:sz w:val="20"/><w:lang w:fareast="EN-US"/></w:rPr><w:t>P value</w:t></w:r></w:p></w:tc><w:tc><w:tcPr><w:tcW w:w="1134" w:type="dxa"/><w:tcBorders><w:top w:val="single" w:sz="4" wx:bdrwidth="10" w:space="0" w:color="auto"/><w:bottom w:val="single" w:sz="4" wx:bdrwidth="10" w:space="0" w:color="auto"/></w:tcBorders></w:tcPr><w:p wsp:rsidR="005B5E1E" wsp:rsidRPr="00E85685" wsp:rsidRDefault="005B5E1E" wsp:rsidP="00EB653E"><w:pPr><w:rPr><w:sz w:val="20"/><w:lang w:fareast="EN-US"/></w:rPr></w:pPr><w:r wsp:rsidRPr="00E85685"><w:rPr><w:sz w:val="20"/><w:lang w:fareast="EN-US"/></w:rPr><w:t>Difference</w:t></w:r></w:p></w:tc><w:tc><w:tcPr><w:tcW w:w="850" w:type="dxa"/><w:tcBorders><w:top w:val="single" w:sz="4" wx:bdrwidth="10" w:space="0" w:color="auto"/><w:bottom w:val="single" w:sz="4" wx:bdrwidth="10" w:space="0" w:color="auto"/></w:tcBorders></w:tcPr><w:p wsp:rsidR="005B5E1E" wsp:rsidRPr="00E85685" wsp:rsidRDefault="005B5E1E" wsp:rsidP="00EB653E"><w:pPr><w:rPr><w:sz w:val="20"/><w:lang w:fareast="EN-US"/></w:rPr></w:pPr><w:r wsp:rsidRPr="00E85685"><w:rPr><w:sz w:val="20"/><w:lang w:fareast="EN-US"/></w:rPr><w:t>P value</w:t></w:r></w:p></w:tc><w:tc><w:tcPr><w:tcW w:w="1134" w:type="dxa"/><w:tcBorders><w:top w:val="single" w:sz="4" wx:bdrwidth="10" w:space="0" w:color="auto"/><w:bottom w:val="single" w:sz="4" wx:bdrwidth="10" w:space="0" w:color="auto"/></w:tcBorders></w:tcPr><w:p wsp:rsidR="005B5E1E" wsp:rsidRPr="00E85685" wsp:rsidRDefault="005B5E1E" wsp:rsidP="00EB653E"><w:pPr><w:rPr><w:sz w:val="20"/><w:lang w:fareast="EN-US"/></w:rPr></w:pPr><w:r wsp:rsidRPr="00E85685"><w:rPr><w:sz w:val="20"/><w:lang w:fareast="EN-US"/></w:rPr><w:t>Difference</w:t></w:r></w:p></w:tc><w:tc><w:tcPr><w:tcW w:w="851" w:type="dxa"/><w:tcBorders><w:top w:val="single" w:sz="4" wx:bdrwidth="10" w:space="0" w:color="auto"/><w:bottom w:val="single" w:sz="4" wx:bdrwidth="10" w:space="0" w:color="auto"/></w:tcBorders></w:tcPr><w:p wsp:rsidR="005B5E1E" wsp:rsidRPr="00E85685" wsp:rsidRDefault="005B5E1E" wsp:rsidP="00EB653E"><w:pPr><w:rPr><w:sz w:val="20"/><w:lang w:fareast="EN-US"/></w:rPr></w:pPr><w:r wsp:rsidRPr="00E85685"><w:rPr><w:sz w:val="20"/><w:lang w:fareast="EN-US"/></w:rPr><w:t>P value</w:t></w:r></w:p></w:tc><w:tc><w:tcPr><w:tcW w:w="1134" w:type="dxa"/><w:tcBorders><w:top w:val="single" w:sz="4" wx:bdrwidth="10" w:space="0" w:color="auto"/><w:bottom w:val="single" w:sz="4" wx:bdrwidth="10" w:space="0" w:color="auto"/></w:tcBorders></w:tcPr><w:p wsp:rsidR="005B5E1E" wsp:rsidRPr="00E85685" wsp:rsidRDefault="005B5E1E" wsp:rsidP="00EB653E"><w:pPr><w:rPr><w:sz w:val="20"/><w:lang w:fareast="EN-US"/></w:rPr></w:pPr><w:r wsp:rsidRPr="00E85685"><w:rPr><w:sz w:val="20"/><w:lang w:fareast="EN-US"/></w:rPr><w:t>Difference</w:t></w:r></w:p></w:tc><w:tc><w:tcPr><w:tcW w:w="852" w:type="dxa"/><w:tcBorders><w:top w:val="single" w:sz="4" wx:bdrwidth="10" w:space="0" w:color="auto"/><w:bottom w:val="single" w:sz="4" wx:bdrwidth="10" w:space="0" w:color="auto"/></w:tcBorders></w:tcPr><w:p wsp:rsidR="005B5E1E" wsp:rsidRPr="00E85685" wsp:rsidRDefault="005B5E1E" wsp:rsidP="00EB653E"><w:pPr><w:rPr><w:sz w:val="20"/><w:lang w:fareast="EN-US"/></w:rPr></w:pPr><w:r wsp:rsidRPr="00E85685"><w:rPr><w:sz w:val="20"/><w:lang w:fareast="EN-US"/></w:rPr><w:t>P value</w:t></w:r></w:p></w:tc></w:tr><w:tr wsp:rsidR="005B5E1E" wsp:rsidRPr="00E434D3" wsp:rsidTr="00EB653E"><w:trPr><w:trHeight w:val="343"/><w:tblHeader/><w:jc w:val="center"/></w:trPr><w:tc><w:tcPr><w:tcW w:w="1463" w:type="dxa"/><w:tcBorders><w:top w:val="single" w:sz="4" wx:bdrwidth="10" w:space="0" w:color="auto"/><w:bottom w:val="nil"/></w:tcBorders></w:tcPr><w:p wsp:rsidR="005B5E1E" wsp:rsidRPr="00E434D3" wsp:rsidRDefault="005B5E1E" wsp:rsidP="00EB653E"><w:pPr><w:ind w:first-line="284"/><w:rPr><w:i/><w:sz w:val="20"/><w:lang w:fareast="EN-US"/></w:rPr></w:pPr><w:r wsp:rsidRPr="00E434D3"><w:rPr><w:i/><w:sz w:val="20"/><w:lang w:fareast="EN-US"/></w:rPr><w:t>V</w:t></w:r><w:r><w:rPr><w:i/><w:sz w:val="20"/><w:lang w:fareast="EN-US"/></w:rPr><w:t>U</w:t></w:r><w:r wsp:rsidRPr="00E434D3"><w:rPr><w:i/><w:sz w:val="20"/><w:lang w:fareast="EN-US"/></w:rPr><w:t> </w:t></w:r><w:r wsp:rsidRPr="00F93A57"><w:rPr><w:sz w:val="20"/><w:lang w:fareast="EN-US"/></w:rPr><w:t>vs</w:t></w:r><w:r><w:rPr><w:i/><w:sz w:val="20"/><w:lang w:fareast="EN-US"/></w:rPr><w:t>. C</w:t></w:r><w:r wsp:rsidRPr="00E434D3"><w:rPr><w:i/><w:sz w:val="20"/><w:lang w:fareast="EN-US"/></w:rPr><w:t> </w:t></w:r><w:r><w:rPr><w:i/><w:sz w:val="20"/><w:lang w:fareast="EN-US"/></w:rPr><w:t>M</w:t></w:r></w:p></w:tc><w:tc><w:tcPr><w:tcW w:w="1134" w:type="dxa"/><w:tcBorders><w:top w:val="single" w:sz="4" wx:bdrwidth="10" w:space="0" w:color="auto"/></w:tcBorders></w:tcPr><w:p wsp:rsidR="005B5E1E" wsp:rsidRPr="00E434D3" wsp:rsidRDefault="005B5E1E" wsp:rsidP="00EB653E"><w:pPr><w:ind w:first-line="284"/><w:rPr><w:sz w:val="20"/><w:lang w:fareast="EN-US"/></w:rPr></w:pPr><w:r wsp:rsidRPr="00E434D3"><w:rPr><w:sz w:val="20"/><w:lang w:fareast="EN-US"/></w:rPr><w:t>ns</w:t></w:r></w:p></w:tc><w:tc><w:tcPr><w:tcW w:w="851" w:type="dxa"/><w:tcBorders><w:top w:val="single" w:sz="4" wx:bdrwidth="10" w:space="0" w:color="auto"/></w:tcBorders></w:tcPr><w:p wsp:rsidR="005B5E1E" wsp:rsidRPr="00E434D3" wsp:rsidRDefault="005B5E1E" wsp:rsidP="00EB653E"><w:pPr><w:rPr><w:sz w:val="20"/><w:lang w:fareast="EN-US"/></w:rPr></w:pPr><w:r wsp:rsidRPr="00E434D3"><w:rPr><w:sz w:val="20"/><w:lang w:fareast="EN-US"/></w:rPr><w:t>P&gt;0.05</w:t></w:r></w:p></w:tc><w:tc><w:tcPr><w:tcW w:w="1134" w:type="dxa"/><w:tcBorders><w:top w:val="single" w:sz="4" wx:bdrwidth="10" w:space="0" w:color="auto"/></w:tcBorders></w:tcPr><w:p wsp:rsidR="005B5E1E" wsp:rsidRPr="00E434D3" wsp:rsidRDefault="005B5E1E" wsp:rsidP="00EB653E"><w:pPr><w:ind w:first-line="284"/><w:rPr><w:sz w:val="20"/><w:lang w:fareast="EN-US"/></w:rPr></w:pPr><w:r wsp:rsidRPr="00E434D3"><w:rPr><w:sz w:val="20"/><w:lang w:fareast="EN-US"/></w:rPr><w:t>ns</w:t></w:r></w:p></w:tc><w:tc><w:tcPr><w:tcW w:w="850" w:type="dxa"/><w:tcBorders><w:top w:val="single" w:sz="4" wx:bdrwidth="10" w:space="0" w:color="auto"/></w:tcBorders></w:tcPr><w:p wsp:rsidR="005B5E1E" wsp:rsidRPr="00E434D3" wsp:rsidRDefault="005B5E1E" wsp:rsidP="00EB653E"><w:pPr><w:rPr><w:sz w:val="20"/><w:lang w:fareast="EN-US"/></w:rPr></w:pPr><w:r wsp:rsidRPr="00E434D3"><w:rPr><w:sz w:val="20"/><w:lang w:fareast="EN-US"/></w:rPr><w:t>P&gt;0.05</w:t></w:r></w:p></w:tc><w:tc><w:tcPr><w:tcW w:w="1134" w:type="dxa"/><w:tcBorders><w:top w:val="single" w:sz="4" wx:bdrwidth="10" w:space="0" w:color="auto"/></w:tcBorders></w:tcPr><w:p wsp:rsidR="005B5E1E" wsp:rsidRPr="00E434D3" wsp:rsidRDefault="005B5E1E" wsp:rsidP="00EB653E"><w:pPr><w:ind w:first-line="284"/><w:rPr><w:sz w:val="20"/><w:lang w:fareast="EN-US"/></w:rPr></w:pPr><w:r wsp:rsidRPr="00E434D3"><w:rPr><w:sz w:val="20"/><w:lang w:fareast="EN-US"/></w:rPr><w:t>ns</w:t></w:r></w:p></w:tc><w:tc><w:tcPr><w:tcW w:w="851" w:type="dxa"/><w:tcBorders><w:top w:val="single" w:sz="4" wx:bdrwidth="10" w:space="0" w:color="auto"/></w:tcBorders></w:tcPr><w:p wsp:rsidR="005B5E1E" wsp:rsidRPr="00E434D3" wsp:rsidRDefault="005B5E1E" wsp:rsidP="00EB653E"><w:pPr><w:rPr><w:sz w:val="20"/><w:lang w:fareast="EN-US"/></w:rPr></w:pPr><w:r wsp:rsidRPr="00E434D3"><w:rPr><w:sz w:val="20"/><w:lang w:fareast="EN-US"/></w:rPr><w:t>P&gt;0.05</w:t></w:r></w:p></w:tc><w:tc><w:tcPr><w:tcW w:w="1134" w:type="dxa"/><w:tcBorders><w:top w:val="single" w:sz="4" wx:bdrwidth="10" w:space="0" w:color="auto"/></w:tcBorders></w:tcPr><w:p wsp:rsidR="005B5E1E" wsp:rsidRPr="00E434D3" wsp:rsidRDefault="005B5E1E" wsp:rsidP="00EB653E"><w:pPr><w:ind w:first-line="284"/><w:rPr><w:sz w:val="20"/><w:lang w:fareast="EN-US"/></w:rPr></w:pPr><w:r wsp:rsidRPr="00E434D3"><w:rPr><w:sz w:val="20"/><w:lang w:fareast="EN-US"/></w:rPr><w:t>ns</w:t></w:r></w:p></w:tc><w:tc><w:tcPr><w:tcW w:w="852" w:type="dxa"/><w:tcBorders><w:top w:val="single" w:sz="4" wx:bdrwidth="10" w:space="0" w:color="auto"/></w:tcBorders></w:tcPr><w:p wsp:rsidR="005B5E1E" wsp:rsidRPr="00E434D3" wsp:rsidRDefault="005B5E1E" wsp:rsidP="00EB653E"><w:pPr><w:rPr><w:sz w:val="20"/><w:lang w:fareast="EN-US"/></w:rPr></w:pPr><w:r wsp:rsidRPr="00E434D3"><w:rPr><w:sz w:val="20"/><w:lang w:fareast="EN-US"/></w:rPr><w:t>P&gt;0.05</w:t></w:r></w:p></w:tc></w:tr><w:tr wsp:rsidR="005B5E1E" wsp:rsidRPr="00E434D3" wsp:rsidTr="00EB653E"><w:trPr><w:tblHeader/><w:jc w:val="center"/></w:trPr><w:tc><w:tcPr><w:tcW w:w="1463" w:type="dxa"/><w:tcBorders><w:top w:val="nil"/></w:tcBorders></w:tcPr><w:p wsp:rsidR="005B5E1E" wsp:rsidRPr="00E434D3" wsp:rsidRDefault="005B5E1E" wsp:rsidP="00EB653E"><w:pPr><w:ind w:first-line="284"/><w:rPr><w:i/><w:sz w:val="20"/><w:lang w:fareast="EN-US"/></w:rPr></w:pPr><w:r><w:rPr><w:i/><w:sz w:val="20"/><w:lang w:fareast="EN-US"/></w:rPr><w:t>VU</w:t></w:r><w:r wsp:rsidRPr="00E434D3"><w:rPr><w:i/><w:sz w:val="20"/><w:lang w:fareast="EN-US"/></w:rPr><w:t> </w:t></w:r><w:r wsp:rsidRPr="00F93A57"><w:rPr><w:sz w:val="20"/><w:lang w:fareast="EN-US"/></w:rPr><w:t>vs</w:t></w:r><w:r><w:rPr><w:i/><w:sz w:val="20"/><w:lang w:fareast="EN-US"/></w:rPr><w:t>. AH</w:t></w:r></w:p></w:tc><w:tc><w:tcPr><w:tcW w:w="1134" w:type="dxa"/></w:tcPr><w:p wsp:rsidR="005B5E1E" wsp:rsidRPr="00E434D3" wsp:rsidRDefault="005B5E1E" wsp:rsidP="00EB653E"><w:pPr><w:ind w:first-line="284"/><w:rPr><w:sz w:val="20"/><w:lang w:fareast="EN-US"/></w:rPr></w:pPr><w:r wsp:rsidRPr="00E434D3"><w:rPr><w:sz w:val="20"/><w:lang w:fareast="EN-US"/></w:rPr><w:t>ns</w:t></w:r></w:p></w:tc><w:tc><w:tcPr><w:tcW w:w="851" w:type="dxa"/></w:tcPr><w:p wsp:rsidR="005B5E1E" wsp:rsidRPr="00E434D3" wsp:rsidRDefault="005B5E1E" wsp:rsidP="00EB653E"><w:pPr><w:rPr><w:sz w:val="20"/><w:lang w:fareast="EN-US"/></w:rPr></w:pPr><w:r wsp:rsidRPr="00E434D3"><w:rPr><w:sz w:val="20"/><w:lang w:fareast="EN-US"/></w:rPr><w:t>P&gt;0.05</w:t></w:r></w:p></w:tc><w:tc><w:tcPr><w:tcW w:w="1134" w:type="dxa"/></w:tcPr><w:p wsp:rsidR="005B5E1E" wsp:rsidRPr="00E434D3" wsp:rsidRDefault="005B5E1E" wsp:rsidP="00EB653E"><w:pPr><w:ind w:first-line="284"/><w:rPr><w:sz w:val="20"/><w:lang w:fareast="EN-US"/></w:rPr></w:pPr><w:r wsp:rsidRPr="00E434D3"><w:rPr><w:sz w:val="20"/><w:lang w:fareast="EN-US"/></w:rPr><w:t>ns</w:t></w:r></w:p></w:tc><w:tc><w:tcPr><w:tcW w:w="850" w:type="dxa"/></w:tcPr><w:p wsp:rsidR="005B5E1E" wsp:rsidRPr="00E434D3" wsp:rsidRDefault="005B5E1E" wsp:rsidP="00EB653E"><w:pPr><w:rPr><w:sz w:val="20"/><w:lang w:fareast="EN-US"/></w:rPr></w:pPr><w:r wsp:rsidRPr="00E434D3"><w:rPr><w:sz w:val="20"/><w:lang w:fareast="EN-US"/></w:rPr><w:t>P&gt;0.05</w:t></w:r></w:p></w:tc><w:tc><w:tcPr><w:tcW w:w="1134" w:type="dxa"/></w:tcPr><w:p wsp:rsidR="005B5E1E" wsp:rsidRPr="00E434D3" wsp:rsidRDefault="005B5E1E" wsp:rsidP="00EB653E"><w:pPr><w:ind w:first-line="284"/><w:rPr><w:sz w:val="20"/><w:lang w:fareast="EN-US"/></w:rPr></w:pPr><w:r wsp:rsidRPr="00E434D3"><w:rPr><w:sz w:val="20"/><w:lang w:fareast="EN-US"/></w:rPr><w:t>ns</w:t></w:r></w:p></w:tc><w:tc><w:tcPr><w:tcW w:w="851" w:type="dxa"/></w:tcPr><w:p wsp:rsidR="005B5E1E" wsp:rsidRPr="00E434D3" wsp:rsidRDefault="005B5E1E" wsp:rsidP="00EB653E"><w:pPr><w:rPr><w:sz w:val="20"/><w:lang w:fareast="EN-US"/></w:rPr></w:pPr><w:r wsp:rsidRPr="00E434D3"><w:rPr><w:sz w:val="20"/><w:lang w:fareast="EN-US"/></w:rPr><w:t>P&gt;0.05</w:t></w:r></w:p></w:tc><w:tc><w:tcPr><w:tcW w:w="1134" w:type="dxa"/></w:tcPr><w:p wsp:rsidR="005B5E1E" wsp:rsidRPr="00E434D3" wsp:rsidRDefault="005B5E1E" wsp:rsidP="00EB653E"><w:pPr><w:ind w:first-line="284"/><w:rPr><w:sz w:val="20"/><w:lang w:fareast="EN-US"/></w:rPr></w:pPr><w:r wsp:rsidRPr="00E434D3"><w:rPr><w:sz w:val="20"/><w:lang w:fareast="EN-US"/></w:rPr><w:t>ns</w:t></w:r></w:p></w:tc><w:tc><w:tcPr><w:tcW w:w="852" w:type="dxa"/></w:tcPr><w:p wsp:rsidR="005B5E1E" wsp:rsidRPr="00E434D3" wsp:rsidRDefault="005B5E1E" wsp:rsidP="00EB653E"><w:pPr><w:rPr><w:sz w:val="20"/><w:lang w:fareast="EN-US"/></w:rPr></w:pPr><w:r wsp:rsidRPr="00E434D3"><w:rPr><w:sz w:val="20"/><w:lang w:fareast="EN-US"/></w:rPr><w:t>P&gt;0.05</w:t></w:r></w:p></w:tc></w:tr><w:tr wsp:rsidR="005B5E1E" wsp:rsidRPr="00E434D3" wsp:rsidTr="00EB653E"><w:trPr><w:tblHeader/><w:jc w:val="center"/></w:trPr><w:tc><w:tcPr><w:tcW w:w="1463" w:type="dxa"/></w:tcPr><w:p wsp:rsidR="005B5E1E" wsp:rsidRPr="00CB078B" wsp:rsidRDefault="005B5E1E" wsp:rsidP="00EB653E"><w:pPr><w:ind w:first-line="284"/><w:rPr><w:i/><w:sz w:val="20"/><w:lang w:fareast="EN-US"/></w:rPr></w:pPr><w:r><w:rPr><w:i/><w:sz w:val="20"/><w:lang w:fareast="EN-US"/></w:rPr><w:t>VU</w:t></w:r><w:r wsp:rsidRPr="00CB078B"><w:rPr><w:i/><w:sz w:val="20"/><w:lang w:fareast="EN-US"/></w:rPr><w:t> </w:t></w:r><w:r wsp:rsidRPr="00CB078B"><w:rPr><w:sz w:val="20"/><w:lang w:fareast="EN-US"/></w:rPr><w:t>vs</w:t></w:r><w:r wsp:rsidR="00577B9C"><w:rPr><w:i/><w:sz w:val="20"/><w:lang w:fareast="EN-US"/></w:rPr><w:t>. AS</w:t></w:r></w:p></w:tc><w:tc><w:tcPr><w:tcW w:w="1134" w:type="dxa"/></w:tcPr><w:p wsp:rsidR="005B5E1E" wsp:rsidRPr="00E434D3" wsp:rsidRDefault="005B5E1E" wsp:rsidP="00EB653E"><w:pPr><w:ind w:first-line="284"/><w:rPr><w:sz w:val="20"/><w:lang w:fareast="EN-US"/></w:rPr></w:pPr><w:r wsp:rsidRPr="00E434D3"><w:rPr><w:sz w:val="20"/><w:lang w:fareast="EN-US"/></w:rPr><w:t>ns</w:t></w:r></w:p></w:tc><w:tc><w:tcPr><w:tcW w:w="851" w:type="dxa"/></w:tcPr><w:p wsp:rsidR="005B5E1E" wsp:rsidRPr="00E434D3" wsp:rsidRDefault="005B5E1E" wsp:rsidP="00EB653E"><w:pPr><w:rPr><w:sz w:val="20"/><w:lang w:fareast="EN-US"/></w:rPr></w:pPr><w:r wsp:rsidRPr="00E434D3"><w:rPr><w:sz w:val="20"/><w:lang w:fareast="EN-US"/></w:rPr><w:t>P&gt;0.05</w:t></w:r></w:p></w:tc><w:tc><w:tcPr><w:tcW w:w="1134" w:type="dxa"/></w:tcPr><w:p wsp:rsidR="005B5E1E" wsp:rsidRPr="00E434D3" wsp:rsidRDefault="005B5E1E" wsp:rsidP="00EB653E"><w:pPr><w:ind w:first-line="284"/><w:rPr><w:sz w:val="20"/><w:lang w:fareast="EN-US"/></w:rPr></w:pPr><w:r wsp:rsidRPr="00E434D3"><w:rPr><w:sz w:val="20"/><w:lang w:fareast="EN-US"/></w:rPr><w:t>ns</w:t></w:r></w:p></w:tc><w:tc><w:tcPr><w:tcW w:w="850" w:type="dxa"/></w:tcPr><w:p wsp:rsidR="005B5E1E" wsp:rsidRPr="00E434D3" wsp:rsidRDefault="005B5E1E" wsp:rsidP="00EB653E"><w:pPr><w:rPr><w:sz w:val="20"/><w:lang w:fareast="EN-US"/></w:rPr></w:pPr><w:r wsp:rsidRPr="00E434D3"><w:rPr><w:sz w:val="20"/><w:lang w:fareast="EN-US"/></w:rPr><w:t>P&gt;0.05</w:t></w:r></w:p></w:tc><w:tc><w:tcPr><w:tcW w:w="1134" w:type="dxa"/></w:tcPr><w:p wsp:rsidR="005B5E1E" wsp:rsidRPr="00E434D3" wsp:rsidRDefault="005B5E1E" wsp:rsidP="00EB653E"><w:pPr><w:ind w:first-line="284"/><w:rPr><w:sz w:val="20"/><w:lang w:fareast="EN-US"/></w:rPr></w:pPr><w:r wsp:rsidRPr="00E434D3"><w:rPr><w:sz w:val="20"/><w:lang w:fareast="EN-US"/></w:rPr><w:t>*</w:t></w:r></w:p></w:tc><w:tc><w:tcPr><w:tcW w:w="851" w:type="dxa"/></w:tcPr><w:p wsp:rsidR="005B5E1E" wsp:rsidRPr="00E434D3" wsp:rsidRDefault="005B5E1E" wsp:rsidP="00EB653E"><w:pPr><w:rPr><w:sz w:val="20"/><w:lang w:fareast="EN-US"/></w:rPr></w:pPr><w:r wsp:rsidRPr="00E434D3"><w:rPr><w:sz w:val="20"/><w:lang w:fareast="EN-US"/></w:rPr><w:t>P</w:t></w:r><w:r><w:rPr><w:sz w:val="20"/><w:lang w:fareast="EN-US"/></w:rPr><w:t>&lt;</w:t></w:r><w:r wsp:rsidRPr="00E434D3"><w:rPr><w:sz w:val="20"/><w:lang w:fareast="EN-US"/></w:rPr><w:t>0.05</w:t></w:r></w:p></w:tc><w:tc><w:tcPr><w:tcW w:w="1134" w:type="dxa"/></w:tcPr><w:p wsp:rsidR="005B5E1E" wsp:rsidRPr="00E434D3" wsp:rsidRDefault="005B5E1E" wsp:rsidP="00EB653E"><w:pPr><w:ind w:first-line="284"/><w:rPr><w:sz w:val="20"/><w:lang w:fareast="EN-US"/></w:rPr></w:pPr><w:r wsp:rsidRPr="00E434D3"><w:rPr><w:sz w:val="20"/><w:lang w:fareast="EN-US"/></w:rPr><w:t>ns</w:t></w:r></w:p></w:tc><w:tc><w:tcPr><w:tcW w:w="852" w:type="dxa"/></w:tcPr><w:p wsp:rsidR="005B5E1E" wsp:rsidRPr="00E434D3" wsp:rsidRDefault="005B5E1E" wsp:rsidP="00EB653E"><w:pPr><w:rPr><w:sz w:val="20"/><w:lang w:fareast="EN-US"/></w:rPr></w:pPr><w:r wsp:rsidRPr="00E434D3"><w:rPr><w:sz w:val="20"/><w:lang w:fareast="EN-US"/></w:rPr><w:t>P&gt;0.05</w:t></w:r></w:p></w:tc></w:tr><w:tr wsp:rsidR="005B5E1E" wsp:rsidRPr="00E434D3" wsp:rsidTr="00EB653E"><w:trPr><w:tblHeader/><w:jc w:val="center"/></w:trPr><w:tc><w:tcPr><w:tcW w:w="1463" w:type="dxa"/></w:tcPr><w:p wsp:rsidR="005B5E1E" wsp:rsidRPr="00CB078B" wsp:rsidRDefault="005B5E1E" wsp:rsidP="00EB653E"><w:pPr><w:ind w:first-line="284"/><w:rPr><w:i/><w:sz w:val="20"/><w:lang w:fareast="EN-US"/></w:rPr></w:pPr><w:r><w:rPr><w:i/><w:sz w:val="20"/><w:lang w:fareast="EN-US"/></w:rPr><w:t>VU </w:t></w:r><w:r wsp:rsidRPr="00CB078B"><w:rPr><w:sz w:val="20"/><w:lang w:fareast="EN-US"/></w:rPr><w:t>vs</w:t></w:r><w:r><w:rPr><w:i/><w:sz w:val="20"/><w:lang w:fareast="EN-US"/></w:rPr><w:t>. SV</w:t></w:r></w:p></w:tc><w:tc><w:tcPr><w:tcW w:w="1134" w:type="dxa"/></w:tcPr><w:p wsp:rsidR="005B5E1E" wsp:rsidRPr="00E434D3" wsp:rsidRDefault="005B5E1E" wsp:rsidP="00EB653E"><w:pPr><w:ind w:first-line="284"/><w:rPr><w:sz w:val="20"/><w:lang w:fareast="EN-US"/></w:rPr></w:pPr><w:r wsp:rsidRPr="00E434D3"><w:rPr><w:sz w:val="20"/><w:lang w:fareast="EN-US"/></w:rPr><w:t>ns</w:t></w:r></w:p></w:tc><w:tc><w:tcPr><w:tcW w:w="851" w:type="dxa"/></w:tcPr><w:p wsp:rsidR="005B5E1E" wsp:rsidRPr="00E434D3" wsp:rsidRDefault="005B5E1E" wsp:rsidP="00EB653E"><w:pPr><w:rPr><w:sz w:val="20"/><w:lang w:fareast="EN-US"/></w:rPr></w:pPr><w:r wsp:rsidRPr="00E434D3"><w:rPr><w:sz w:val="20"/><w:lang w:fareast="EN-US"/></w:rPr><w:t>P&gt;0.05</w:t></w:r></w:p></w:tc><w:tc><w:tcPr><w:tcW w:w="1134" w:type="dxa"/></w:tcPr><w:p wsp:rsidR="005B5E1E" wsp:rsidRPr="00E434D3" wsp:rsidRDefault="005B5E1E" wsp:rsidP="00EB653E"><w:pPr><w:ind w:first-line="284"/><w:rPr><w:sz w:val="20"/><w:lang w:fareast="EN-US"/></w:rPr></w:pPr><w:r wsp:rsidRPr="00E434D3"><w:rPr><w:sz w:val="20"/><w:lang w:fareast="EN-US"/></w:rPr><w:t>ns</w:t></w:r></w:p></w:tc><w:tc><w:tcPr><w:tcW w:w="850" w:type="dxa"/></w:tcPr><w:p wsp:rsidR="005B5E1E" wsp:rsidRPr="00E434D3" wsp:rsidRDefault="005B5E1E" wsp:rsidP="00EB653E"><w:pPr><w:rPr><w:sz w:val="20"/><w:lang w:fareast="EN-US"/></w:rPr></w:pPr><w:r wsp:rsidRPr="00E434D3"><w:rPr><w:sz w:val="20"/><w:lang w:fareast="EN-US"/></w:rPr><w:t>P&gt;0.05</w:t></w:r></w:p></w:tc><w:tc><w:tcPr><w:tcW w:w="1134" w:type="dxa"/></w:tcPr><w:p wsp:rsidR="005B5E1E" wsp:rsidRPr="00E434D3" wsp:rsidRDefault="005B5E1E" wsp:rsidP="00EB653E"><w:pPr><w:ind w:first-line="284"/><w:rPr><w:sz w:val="20"/><w:lang w:fareast="EN-US"/></w:rPr></w:pPr><w:r wsp:rsidRPr="00E434D3"><w:rPr><w:sz w:val="20"/><w:lang w:fareast="EN-US"/></w:rPr><w:t>ns</w:t></w:r></w:p></w:tc><w:tc><w:tcPr><w:tcW w:w="851" w:type="dxa"/></w:tcPr><w:p wsp:rsidR="005B5E1E" wsp:rsidRPr="00E434D3" wsp:rsidRDefault="005B5E1E" wsp:rsidP="00EB653E"><w:pPr><w:rPr><w:sz w:val="20"/><w:lang w:fareast="EN-US"/></w:rPr></w:pPr><w:r wsp:rsidRPr="00E434D3"><w:rPr><w:sz w:val="20"/><w:lang w:fareast="EN-US"/></w:rPr><w:t>P&gt;0.05</w:t></w:r></w:p></w:tc><w:tc><w:tcPr><w:tcW w:w="1134" w:type="dxa"/></w:tcPr><w:p wsp:rsidR="005B5E1E" wsp:rsidRPr="00E434D3" wsp:rsidRDefault="005B5E1E" wsp:rsidP="00EB653E"><w:pPr><w:ind w:first-line="284"/><w:rPr><w:sz w:val="20"/><w:lang w:fareast="EN-US"/></w:rPr></w:pPr><w:r wsp:rsidRPr="00E434D3"><w:rPr><w:sz w:val="20"/><w:lang w:fareast="EN-US"/></w:rPr><w:t>ns</w:t></w:r></w:p></w:tc><w:tc><w:tcPr><w:tcW w:w="852" w:type="dxa"/></w:tcPr><w:p wsp:rsidR="005B5E1E" wsp:rsidRPr="00E434D3" wsp:rsidRDefault="005B5E1E" wsp:rsidP="00EB653E"><w:pPr><w:rPr><w:sz w:val="20"/><w:lang w:fareast="EN-US"/></w:rPr></w:pPr><w:r wsp:rsidRPr="00E434D3"><w:rPr><w:sz w:val="20"/><w:lang w:fareast="EN-US"/></w:rPr><w:t>P&gt;0.05</w:t></w:r></w:p></w:tc></w:tr><w:tr wsp:rsidR="005B5E1E" wsp:rsidRPr="00E434D3" wsp:rsidTr="00EB653E"><w:trPr><w:tblHeader/><w:jc w:val="center"/></w:trPr><w:tc><w:tcPr><w:tcW w:w="1463" w:type="dxa"/></w:tcPr><w:p wsp:rsidR="005B5E1E" wsp:rsidRPr="00E434D3" wsp:rsidRDefault="005B5E1E" wsp:rsidP="00EB653E"><w:pPr><w:ind w:first-line="284"/><w:rPr><w:i/><w:sz w:val="20"/><w:lang w:fareast="EN-US"/></w:rPr></w:pPr><w:r><w:rPr><w:i/><w:sz w:val="20"/><w:lang w:fareast="EN-US"/></w:rPr><w:t>VU</w:t></w:r><w:r wsp:rsidRPr="00E434D3"><w:rPr><w:i/><w:sz w:val="20"/><w:lang w:fareast="EN-US"/></w:rPr><w:t> </w:t></w:r><w:r wsp:rsidRPr="00F93A57"><w:rPr><w:sz w:val="20"/><w:lang w:fareast="EN-US"/></w:rPr><w:t>vs</w:t></w:r><w:r><w:rPr><w:i/><w:sz w:val="20"/><w:lang w:fareast="EN-US"/></w:rPr><w:t>. SS</w:t></w:r></w:p></w:tc><w:tc><w:tcPr><w:tcW w:w="1134" w:type="dxa"/></w:tcPr><w:p wsp:rsidR="005B5E1E" wsp:rsidRPr="00E434D3" wsp:rsidRDefault="005B5E1E" wsp:rsidP="00EB653E"><w:pPr><w:ind w:first-line="284"/><w:rPr><w:sz w:val="20"/><w:lang w:fareast="EN-US"/></w:rPr></w:pPr><w:r wsp:rsidRPr="00E434D3"><w:rPr><w:sz w:val="20"/><w:lang w:fareast="EN-US"/></w:rPr><w:t>ns</w:t></w:r></w:p></w:tc><w:tc><w:tcPr><w:tcW w:w="851" w:type="dxa"/></w:tcPr><w:p wsp:rsidR="005B5E1E" wsp:rsidRPr="00E434D3" wsp:rsidRDefault="005B5E1E" wsp:rsidP="00EB653E"><w:pPr><w:rPr><w:sz w:val="20"/><w:lang w:fareast="EN-US"/></w:rPr></w:pPr><w:r wsp:rsidRPr="00E434D3"><w:rPr><w:sz w:val="20"/><w:lang w:fareast="EN-US"/></w:rPr><w:t>P&gt;0.05</w:t></w:r></w:p></w:tc><w:tc><w:tcPr><w:tcW w:w="1134" w:type="dxa"/></w:tcPr><w:p wsp:rsidR="005B5E1E" wsp:rsidRPr="00E434D3" wsp:rsidRDefault="005B5E1E" wsp:rsidP="00EB653E"><w:pPr><w:ind w:first-line="284"/><w:rPr><w:sz w:val="20"/><w:lang w:fareast="EN-US"/></w:rPr></w:pPr><w:r wsp:rsidRPr="00E434D3"><w:rPr><w:sz w:val="20"/><w:lang w:fareast="EN-US"/></w:rPr><w:t>ns</w:t></w:r></w:p></w:tc><w:tc><w:tcPr><w:tcW w:w="850" w:type="dxa"/></w:tcPr><w:p wsp:rsidR="005B5E1E" wsp:rsidRPr="00E434D3" wsp:rsidRDefault="005B5E1E" wsp:rsidP="00EB653E"><w:pPr><w:rPr><w:sz w:val="20"/><w:lang w:fareast="EN-US"/></w:rPr></w:pPr><w:r wsp:rsidRPr="00E434D3"><w:rPr><w:sz w:val="20"/><w:lang w:fareast="EN-US"/></w:rPr><w:t>P&gt;0.05</w:t></w:r></w:p></w:tc><w:tc><w:tcPr><w:tcW w:w="1134" w:type="dxa"/></w:tcPr><w:p wsp:rsidR="005B5E1E" wsp:rsidRPr="00E434D3" wsp:rsidRDefault="005B5E1E" wsp:rsidP="00EB653E"><w:pPr><w:ind w:first-line="284"/><w:rPr><w:sz w:val="20"/><w:lang w:fareast="EN-US"/></w:rPr></w:pPr><w:r wsp:rsidRPr="00E434D3"><w:rPr><w:sz w:val="20"/><w:lang w:fareast="EN-US"/></w:rPr><w:t>ns</w:t></w:r></w:p></w:tc><w:tc><w:tcPr><w:tcW w:w="851" w:type="dxa"/></w:tcPr><w:p wsp:rsidR="005B5E1E" wsp:rsidRPr="00E434D3" wsp:rsidRDefault="005B5E1E" wsp:rsidP="00EB653E"><w:pPr><w:rPr><w:sz w:val="20"/><w:lang w:fareast="EN-US"/></w:rPr></w:pPr><w:r wsp:rsidRPr="00E434D3"><w:rPr><w:sz w:val="20"/><w:lang w:fareast="EN-US"/></w:rPr><w:t>P&gt;0.05</w:t></w:r></w:p></w:tc><w:tc><w:tcPr><w:tcW w:w="1134" w:type="dxa"/></w:tcPr><w:p wsp:rsidR="005B5E1E" wsp:rsidRPr="00E434D3" wsp:rsidRDefault="005B5E1E" wsp:rsidP="00EB653E"><w:pPr><w:ind w:first-line="284"/><w:rPr><w:sz w:val="20"/><w:lang w:fareast="EN-US"/></w:rPr></w:pPr><w:r wsp:rsidRPr="00E434D3"><w:rPr><w:sz w:val="20"/><w:lang w:fareast="EN-US"/></w:rPr><w:t>ns</w:t></w:r></w:p></w:tc><w:tc><w:tcPr><w:tcW w:w="852" w:type="dxa"/></w:tcPr><w:p wsp:rsidR="005B5E1E" wsp:rsidRPr="00E434D3" wsp:rsidRDefault="005B5E1E" wsp:rsidP="00EB653E"><w:pPr><w:rPr><w:sz w:val="20"/><w:lang w:fareast="EN-US"/></w:rPr></w:pPr><w:r wsp:rsidRPr="00E434D3"><w:rPr><w:sz w:val="20"/><w:lang w:fareast="EN-US"/></w:rPr><w:t>P&gt;0.05</w:t></w:r></w:p></w:tc></w:tr><w:tr wsp:rsidR="005B5E1E" wsp:rsidRPr="00E434D3" wsp:rsidTr="00EB653E"><w:trPr><w:tblHeader/><w:jc w:val="center"/></w:trPr><w:tc><w:tcPr><w:tcW w:w="1463" w:type="dxa"/></w:tcPr><w:p wsp:rsidR="005B5E1E" wsp:rsidRPr="00CB078B" wsp:rsidRDefault="005B5E1E" wsp:rsidP="00EB653E"><w:pPr><w:ind w:first-line="284"/><w:rPr><w:i/><w:sz w:val="20"/><w:lang w:fareast="EN-US"/></w:rPr></w:pPr><w:r><w:rPr><w:i/><w:sz w:val="20"/><w:lang w:fareast="EN-US"/></w:rPr><w:t>VU</w:t></w:r><w:r wsp:rsidRPr="00CB078B"><w:rPr><w:i/><w:sz w:val="20"/><w:lang w:fareast="EN-US"/></w:rPr><w:t> </w:t></w:r><w:r wsp:rsidRPr="00CB078B"><w:rPr><w:sz w:val="20"/><w:lang w:fareast="EN-US"/></w:rPr><w:t>vs</w:t></w:r><w:r><w:rPr><w:i/><w:sz w:val="20"/><w:lang w:fareast="EN-US"/></w:rPr><w:t>. IB</w:t></w:r></w:p></w:tc><w:tc><w:tcPr><w:tcW w:w="1134" w:type="dxa"/></w:tcPr><w:p wsp:rsidR="005B5E1E" wsp:rsidRPr="00E434D3" wsp:rsidRDefault="005B5E1E" wsp:rsidP="00EB653E"><w:pPr><w:ind w:first-line="284"/><w:rPr><w:sz w:val="20"/><w:lang w:fareast="EN-US"/></w:rPr></w:pPr><w:r wsp:rsidRPr="00E434D3"><w:rPr><w:sz w:val="20"/><w:lang w:fareast="EN-US"/></w:rPr><w:t>ns</w:t></w:r></w:p></w:tc><w:tc><w:tcPr><w:tcW w:w="851" w:type="dxa"/></w:tcPr><w:p wsp:rsidR="005B5E1E" wsp:rsidRPr="00E434D3" wsp:rsidRDefault="005B5E1E" wsp:rsidP="00EB653E"><w:pPr><w:rPr><w:sz w:val="20"/><w:lang w:fareast="EN-US"/></w:rPr></w:pPr><w:r wsp:rsidRPr="00E434D3"><w:rPr><w:sz w:val="20"/><w:lang w:fareast="EN-US"/></w:rPr><w:t>P&gt;0.05</w:t></w:r></w:p></w:tc><w:tc><w:tcPr><w:tcW w:w="1134" w:type="dxa"/></w:tcPr><w:p wsp:rsidR="005B5E1E" wsp:rsidRPr="00E434D3" wsp:rsidRDefault="005B5E1E" wsp:rsidP="00EB653E"><w:pPr><w:ind w:first-line="284"/><w:rPr><w:sz w:val="20"/><w:lang w:fareast="EN-US"/></w:rPr></w:pPr><w:r wsp:rsidRPr="00E434D3"><w:rPr><w:sz w:val="20"/><w:lang w:fareast="EN-US"/></w:rPr><w:t>ns</w:t></w:r></w:p></w:tc><w:tc><w:tcPr><w:tcW w:w="850" w:type="dxa"/></w:tcPr><w:p wsp:rsidR="005B5E1E" wsp:rsidRPr="00E434D3" wsp:rsidRDefault="005B5E1E" wsp:rsidP="00EB653E"><w:pPr><w:rPr><w:sz w:val="20"/><w:lang w:fareast="EN-US"/></w:rPr></w:pPr><w:r wsp:rsidRPr="00E434D3"><w:rPr><w:sz w:val="20"/><w:lang w:fareast="EN-US"/></w:rPr><w:t>P&gt;0.05</w:t></w:r></w:p></w:tc><w:tc><w:tcPr><w:tcW w:w="1134" w:type="dxa"/></w:tcPr><w:p wsp:rsidR="005B5E1E" wsp:rsidRPr="00E434D3" wsp:rsidRDefault="005B5E1E" wsp:rsidP="00EB653E"><w:pPr><w:ind w:first-line="284"/><w:rPr><w:sz w:val="20"/><w:lang w:fareast="EN-US"/></w:rPr></w:pPr><w:r wsp:rsidRPr="00E434D3"><w:rPr><w:sz w:val="20"/><w:lang w:fareast="EN-US"/></w:rPr><w:t>ns</w:t></w:r></w:p></w:tc><w:tc><w:tcPr><w:tcW w:w="851" w:type="dxa"/></w:tcPr><w:p wsp:rsidR="005B5E1E" wsp:rsidRPr="00E434D3" wsp:rsidRDefault="005B5E1E" wsp:rsidP="00EB653E"><w:pPr><w:rPr><w:sz w:val="20"/><w:lang w:fareast="EN-US"/></w:rPr></w:pPr><w:r wsp:rsidRPr="00E434D3"><w:rPr><w:sz w:val="20"/><w:lang w:fareast="EN-US"/></w:rPr><w:t>P&gt;0.05</w:t></w:r></w:p></w:tc><w:tc><w:tcPr><w:tcW w:w="1134" w:type="dxa"/></w:tcPr><w:p wsp:rsidR="005B5E1E" wsp:rsidRPr="00E434D3" wsp:rsidRDefault="005B5E1E" wsp:rsidP="00EB653E"><w:pPr><w:ind w:first-line="284"/><w:rPr><w:sz w:val="20"/><w:lang w:fareast="EN-US"/></w:rPr></w:pPr><w:r wsp:rsidRPr="00E434D3"><w:rPr><w:sz w:val="20"/><w:lang w:fareast="EN-US"/></w:rPr><w:t>ns</w:t></w:r></w:p></w:tc><w:tc><w:tcPr><w:tcW w:w="852" w:type="dxa"/></w:tcPr><w:p wsp:rsidR="005B5E1E" wsp:rsidRPr="00E434D3" wsp:rsidRDefault="005B5E1E" wsp:rsidP="00EB653E"><w:pPr><w:rPr><w:sz w:val="20"/><w:lang w:fareast="EN-US"/></w:rPr></w:pPr><w:r wsp:rsidRPr="00E434D3"><w:rPr><w:sz w:val="20"/><w:lang w:fareast="EN-US"/></w:rPr><w:t>P&gt;0.05</w:t></w:r></w:p></w:tc></w:tr><w:tr wsp:rsidR="005B5E1E" wsp:rsidRPr="00E434D3" wsp:rsidTr="00EB653E"><w:trPr><w:tblHeader/><w:jc w:val="center"/></w:trPr><w:tc><w:tcPr><w:tcW w:w="1463" w:type="dxa"/></w:tcPr><w:p wsp:rsidR="005B5E1E" wsp:rsidRPr="00E434D3" wsp:rsidRDefault="005B5E1E" wsp:rsidP="00EB653E"><w:pPr><w:ind w:first-line="284"/><w:rPr><w:i/><w:sz w:val="20"/><w:lang w:fareast="EN-US"/></w:rPr></w:pPr><w:r><w:rPr><w:i/><w:sz w:val="20"/><w:lang w:fareast="EN-US"/></w:rPr><w:t>CM vs. AH</w:t></w:r></w:p></w:tc><w:tc><w:tcPr><w:tcW w:w="1134" w:type="dxa"/></w:tcPr><w:p wsp:rsidR="005B5E1E" wsp:rsidRPr="00E434D3" wsp:rsidRDefault="005B5E1E" wsp:rsidP="00EB653E"><w:pPr><w:ind w:first-line="284"/><w:rPr><w:sz w:val="20"/><w:lang w:fareast="EN-US"/></w:rPr></w:pPr><w:r wsp:rsidRPr="00E434D3"><w:rPr><w:sz w:val="20"/><w:lang w:fareast="EN-US"/></w:rPr><w:t>ns</w:t></w:r></w:p></w:tc><w:tc><w:tcPr><w:tcW w:w="851" w:type="dxa"/></w:tcPr><w:p wsp:rsidR="005B5E1E" wsp:rsidRPr="00E434D3" wsp:rsidRDefault="005B5E1E" wsp:rsidP="00EB653E"><w:pPr><w:rPr><w:sz w:val="20"/><w:lang w:fareast="EN-US"/></w:rPr></w:pPr><w:r wsp:rsidRPr="00E434D3"><w:rPr><w:sz w:val="20"/><w:lang w:fareast="EN-US"/></w:rPr><w:t>P&gt;0.05</w:t></w:r></w:p></w:tc><w:tc><w:tcPr><w:tcW w:w="1134" w:type="dxa"/></w:tcPr><w:p wsp:rsidR="005B5E1E" wsp:rsidRPr="00E434D3" wsp:rsidRDefault="005B5E1E" wsp:rsidP="00EB653E"><w:pPr><w:ind w:first-line="284"/><w:rPr><w:sz w:val="20"/><w:lang w:fareast="EN-US"/></w:rPr></w:pPr><w:r wsp:rsidRPr="00E434D3"><w:rPr><w:sz w:val="20"/><w:lang w:fareast="EN-US"/></w:rPr><w:t>ns</w:t></w:r></w:p></w:tc><w:tc><w:tcPr><w:tcW w:w="850" w:type="dxa"/></w:tcPr><w:p wsp:rsidR="005B5E1E" wsp:rsidRPr="00E434D3" wsp:rsidRDefault="005B5E1E" wsp:rsidP="00EB653E"><w:pPr><w:rPr><w:sz w:val="20"/><w:lang w:fareast="EN-US"/></w:rPr></w:pPr><w:r wsp:rsidRPr="00E434D3"><w:rPr><w:sz w:val="20"/><w:lang w:fareast="EN-US"/></w:rPr><w:t>P&gt;0.05</w:t></w:r></w:p></w:tc><w:tc><w:tcPr><w:tcW w:w="1134" w:type="dxa"/></w:tcPr><w:p wsp:rsidR="005B5E1E" wsp:rsidRPr="00E434D3" wsp:rsidRDefault="005B5E1E" wsp:rsidP="00EB653E"><w:pPr><w:ind w:first-line="284"/><w:rPr><w:sz w:val="20"/><w:lang w:fareast="EN-US"/></w:rPr></w:pPr><w:r wsp:rsidRPr="00E434D3"><w:rPr><w:sz w:val="20"/><w:lang w:fareast="EN-US"/></w:rPr><w:t>ns</w:t></w:r></w:p></w:tc><w:tc><w:tcPr><w:tcW w:w="851" w:type="dxa"/></w:tcPr><w:p wsp:rsidR="005B5E1E" wsp:rsidRPr="00E434D3" wsp:rsidRDefault="005B5E1E" wsp:rsidP="00EB653E"><w:pPr><w:rPr><w:sz w:val="20"/><w:lang w:fareast="EN-US"/></w:rPr></w:pPr><w:r wsp:rsidRPr="00E434D3"><w:rPr><w:sz w:val="20"/><w:lang w:fareast="EN-US"/></w:rPr><w:t>P&gt;0.05</w:t></w:r></w:p></w:tc><w:tc><w:tcPr><w:tcW w:w="1134" w:type="dxa"/></w:tcPr><w:p wsp:rsidR="005B5E1E" wsp:rsidRPr="00E434D3" wsp:rsidRDefault="005B5E1E" wsp:rsidP="00EB653E"><w:pPr><w:ind w:first-line="284"/><w:rPr><w:sz w:val="20"/><w:lang w:fareast="EN-US"/></w:rPr></w:pPr><w:r wsp:rsidRPr="00E434D3"><w:rPr><w:sz w:val="20"/><w:lang w:fareast="EN-US"/></w:rPr><w:t>ns</w:t></w:r></w:p></w:tc><w:tc><w:tcPr><w:tcW w:w="852" w:type="dxa"/></w:tcPr><w:p wsp:rsidR="005B5E1E" wsp:rsidRPr="00E434D3" wsp:rsidRDefault="005B5E1E" wsp:rsidP="00EB653E"><w:pPr><w:rPr><w:sz w:val="20"/><w:lang w:fareast="EN-US"/></w:rPr></w:pPr><w:r wsp:rsidRPr="00E434D3"><w:rPr><w:sz w:val="20"/><w:lang w:fareast="EN-US"/></w:rPr><w:t>P&gt;0.05</w:t></w:r></w:p></w:tc></w:tr><w:tr wsp:rsidR="005B5E1E" wsp:rsidRPr="00E434D3" wsp:rsidTr="00EB653E"><w:trPr><w:tblHeader/><w:jc w:val="center"/></w:trPr><w:tc><w:tcPr><w:tcW w:w="1463" w:type="dxa"/></w:tcPr><w:p wsp:rsidR="005B5E1E" wsp:rsidRPr="00CB078B" wsp:rsidRDefault="00577B9C" wsp:rsidP="00EB653E"><w:pPr><w:ind w:first-line="284"/><w:rPr><w:i/><w:sz w:val="20"/><w:lang w:fareast="EN-US"/></w:rPr></w:pPr><w:r><w:rPr><w:i/><w:sz w:val="20"/><w:lang w:fareast="EN-US"/></w:rPr><w:t>CM vs. AS</w:t></w:r></w:p></w:tc><w:tc><w:tcPr><w:tcW w:w="1134" w:type="dxa"/></w:tcPr><w:p wsp:rsidR="005B5E1E" wsp:rsidRPr="00E434D3" wsp:rsidRDefault="005B5E1E" wsp:rsidP="00EB653E"><w:pPr><w:ind w:first-line="284"/><w:rPr><w:sz w:val="20"/><w:lang w:fareast="EN-US"/></w:rPr></w:pPr><w:r wsp:rsidRPr="00E434D3"><w:rPr><w:sz w:val="20"/><w:lang w:fareast="EN-US"/></w:rPr><w:t>*</w:t></w:r></w:p></w:tc><w:tc><w:tcPr><w:tcW w:w="851" w:type="dxa"/></w:tcPr><w:p wsp:rsidR="005B5E1E" wsp:rsidRPr="00E434D3" wsp:rsidRDefault="005B5E1E" wsp:rsidP="00EB653E"><w:pPr><w:rPr><w:sz w:val="20"/><w:lang w:fareast="EN-US"/></w:rPr></w:pPr><w:r wsp:rsidRPr="00E434D3"><w:rPr><w:sz w:val="20"/><w:lang w:fareast="EN-US"/></w:rPr><w:t>P&lt;0.05</w:t></w:r></w:p></w:tc><w:tc><w:tcPr><w:tcW w:w="1134" w:type="dxa"/></w:tcPr><w:p wsp:rsidR="005B5E1E" wsp:rsidRPr="00E434D3" wsp:rsidRDefault="005B5E1E" wsp:rsidP="00EB653E"><w:pPr><w:ind w:first-line="284"/><w:rPr><w:sz w:val="20"/><w:lang w:fareast="EN-US"/></w:rPr></w:pPr><w:r wsp:rsidRPr="00E434D3"><w:rPr><w:sz w:val="20"/><w:lang w:fareast="EN-US"/></w:rPr><w:t>**</w:t></w:r></w:p></w:tc><w:tc><w:tcPr><w:tcW w:w="850" w:type="dxa"/></w:tcPr><w:p wsp:rsidR="005B5E1E" wsp:rsidRPr="00E434D3" wsp:rsidRDefault="005B5E1E" wsp:rsidP="00EB653E"><w:pPr><w:rPr><w:sz w:val="20"/><w:lang w:fareast="EN-US"/></w:rPr></w:pPr><w:r wsp:rsidRPr="00E434D3"><w:rPr><w:sz w:val="20"/><w:lang w:fareast="EN-US"/></w:rPr><w:t>P&lt;0.01</w:t></w:r></w:p></w:tc><w:tc><w:tcPr><w:tcW w:w="1134" w:type="dxa"/></w:tcPr><w:p wsp:rsidR="005B5E1E" wsp:rsidRPr="00E434D3" wsp:rsidRDefault="005B5E1E" wsp:rsidP="00EB653E"><w:pPr><w:ind w:first-line="284"/><w:rPr><w:sz w:val="20"/><w:lang w:fareast="EN-US"/></w:rPr></w:pPr><w:r wsp:rsidRPr="00E434D3"><w:rPr><w:sz w:val="20"/><w:lang w:fareast="EN-US"/></w:rPr><w:t>ns</w:t></w:r></w:p></w:tc><w:tc><w:tcPr><w:tcW w:w="851" w:type="dxa"/></w:tcPr><w:p wsp:rsidR="005B5E1E" wsp:rsidRPr="00E434D3" wsp:rsidRDefault="005B5E1E" wsp:rsidP="00EB653E"><w:pPr><w:rPr><w:sz w:val="20"/><w:lang w:fareast="EN-US"/></w:rPr></w:pPr><w:r wsp:rsidRPr="00E434D3"><w:rPr><w:sz w:val="20"/><w:lang w:fareast="EN-US"/></w:rPr><w:t>P&gt;0.05</w:t></w:r></w:p></w:tc><w:tc><w:tcPr><w:tcW w:w="1134" w:type="dxa"/></w:tcPr><w:p wsp:rsidR="005B5E1E" wsp:rsidRPr="00E434D3" wsp:rsidRDefault="005B5E1E" wsp:rsidP="00EB653E"><w:pPr><w:ind w:first-line="284"/><w:rPr><w:sz w:val="20"/><w:lang w:fareast="EN-US"/></w:rPr></w:pPr><w:r wsp:rsidRPr="00E434D3"><w:rPr><w:sz w:val="20"/><w:lang w:fareast="EN-US"/></w:rPr><w:t>**</w:t></w:r></w:p></w:tc><w:tc><w:tcPr><w:tcW w:w="852" w:type="dxa"/></w:tcPr><w:p wsp:rsidR="005B5E1E" wsp:rsidRPr="00E434D3" wsp:rsidRDefault="005B5E1E" wsp:rsidP="00EB653E"><w:pPr><w:rPr><w:sz w:val="20"/><w:lang w:fareast="EN-US"/></w:rPr></w:pPr><w:r wsp:rsidRPr="00E434D3"><w:rPr><w:sz w:val="20"/><w:lang w:fareast="EN-US"/></w:rPr><w:t>P&lt;0.01</w:t></w:r></w:p></w:tc></w:tr><w:tr wsp:rsidR="005B5E1E" wsp:rsidRPr="00E434D3" wsp:rsidTr="00EB653E"><w:trPr><w:tblHeader/><w:jc w:val="center"/></w:trPr><w:tc><w:tcPr><w:tcW w:w="1463" w:type="dxa"/></w:tcPr><w:p wsp:rsidR="005B5E1E" wsp:rsidRPr="00CB078B" wsp:rsidRDefault="005B5E1E" wsp:rsidP="00EB653E"><w:pPr><w:ind w:first-line="284"/><w:rPr><w:i/><w:sz w:val="20"/><w:lang w:fareast="EN-US"/></w:rPr></w:pPr><w:r><w:rPr><w:i/><w:sz w:val="20"/><w:lang w:fareast="EN-US"/></w:rPr><w:t>CM vs. SV</w:t></w:r></w:p></w:tc><w:tc><w:tcPr><w:tcW w:w="1134" w:type="dxa"/></w:tcPr><w:p wsp:rsidR="005B5E1E" wsp:rsidRPr="00E434D3" wsp:rsidRDefault="005B5E1E" wsp:rsidP="00EB653E"><w:pPr><w:ind w:first-line="284"/><w:rPr><w:sz w:val="20"/><w:lang w:fareast="EN-US"/></w:rPr></w:pPr><w:r wsp:rsidRPr="00E434D3"><w:rPr><w:sz w:val="20"/><w:lang w:fareast="EN-US"/></w:rPr><w:t>ns</w:t></w:r></w:p></w:tc><w:tc><w:tcPr><w:tcW w:w="851" w:type="dxa"/></w:tcPr><w:p wsp:rsidR="005B5E1E" wsp:rsidRPr="00E434D3" wsp:rsidRDefault="005B5E1E" wsp:rsidP="00EB653E"><w:pPr><w:rPr><w:sz w:val="20"/><w:lang w:fareast="EN-US"/></w:rPr></w:pPr><w:r wsp:rsidRPr="00E434D3"><w:rPr><w:sz w:val="20"/><w:lang w:fareast="EN-US"/></w:rPr><w:t>P&gt;0.05</w:t></w:r></w:p></w:tc><w:tc><w:tcPr><w:tcW w:w="1134" w:type="dxa"/></w:tcPr><w:p wsp:rsidR="005B5E1E" wsp:rsidRPr="00E434D3" wsp:rsidRDefault="005B5E1E" wsp:rsidP="00EB653E"><w:pPr><w:ind w:first-line="284"/><w:rPr><w:sz w:val="20"/><w:lang w:fareast="EN-US"/></w:rPr></w:pPr><w:r wsp:rsidRPr="00E434D3"><w:rPr><w:sz w:val="20"/><w:lang w:fareast="EN-US"/></w:rPr><w:t>ns</w:t></w:r></w:p></w:tc><w:tc><w:tcPr><w:tcW w:w="850" w:type="dxa"/></w:tcPr><w:p wsp:rsidR="005B5E1E" wsp:rsidRPr="00E434D3" wsp:rsidRDefault="005B5E1E" wsp:rsidP="00EB653E"><w:pPr><w:rPr><w:sz w:val="20"/><w:lang w:fareast="EN-US"/></w:rPr></w:pPr><w:r wsp:rsidRPr="00E434D3"><w:rPr><w:sz w:val="20"/><w:lang w:fareast="EN-US"/></w:rPr><w:t>P&gt;0.05</w:t></w:r></w:p></w:tc><w:tc><w:tcPr><w:tcW w:w="1134" w:type="dxa"/></w:tcPr><w:p wsp:rsidR="005B5E1E" wsp:rsidRPr="00E434D3" wsp:rsidRDefault="005B5E1E" wsp:rsidP="00EB653E"><w:pPr><w:ind w:first-line="284"/><w:rPr><w:sz w:val="20"/><w:lang w:fareast="EN-US"/></w:rPr></w:pPr><w:r wsp:rsidRPr="00E434D3"><w:rPr><w:sz w:val="20"/><w:lang w:fareast="EN-US"/></w:rPr><w:t>ns</w:t></w:r></w:p></w:tc><w:tc><w:tcPr><w:tcW w:w="851" w:type="dxa"/></w:tcPr><w:p wsp:rsidR="005B5E1E" wsp:rsidRPr="00E434D3" wsp:rsidRDefault="005B5E1E" wsp:rsidP="00EB653E"><w:pPr><w:rPr><w:sz w:val="20"/><w:lang w:fareast="EN-US"/></w:rPr></w:pPr><w:r wsp:rsidRPr="00E434D3"><w:rPr><w:sz w:val="20"/><w:lang w:fareast="EN-US"/></w:rPr><w:t>P&gt;0.05</w:t></w:r></w:p></w:tc><w:tc><w:tcPr><w:tcW w:w="1134" w:type="dxa"/></w:tcPr><w:p wsp:rsidR="005B5E1E" wsp:rsidRPr="00E434D3" wsp:rsidRDefault="005B5E1E" wsp:rsidP="00EB653E"><w:pPr><w:ind w:first-line="284"/><w:rPr><w:sz w:val="20"/><w:lang w:fareast="EN-US"/></w:rPr></w:pPr><w:r wsp:rsidRPr="00E434D3"><w:rPr><w:sz w:val="20"/><w:lang w:fareast="EN-US"/></w:rPr><w:t>ns</w:t></w:r></w:p></w:tc><w:tc><w:tcPr><w:tcW w:w="852" w:type="dxa"/></w:tcPr><w:p wsp:rsidR="005B5E1E" wsp:rsidRPr="00E434D3" wsp:rsidRDefault="005B5E1E" wsp:rsidP="00EB653E"><w:pPr><w:rPr><w:sz w:val="20"/><w:lang w:fareast="EN-US"/></w:rPr></w:pPr><w:r wsp:rsidRPr="00E434D3"><w:rPr><w:sz w:val="20"/><w:lang w:fareast="EN-US"/></w:rPr><w:t>P&gt;0.05</w:t></w:r></w:p></w:tc></w:tr><w:tr wsp:rsidR="005B5E1E" wsp:rsidRPr="00E434D3" wsp:rsidTr="00EB653E"><w:trPr><w:tblHeader/><w:jc w:val="center"/></w:trPr><w:tc><w:tcPr><w:tcW w:w="1463" w:type="dxa"/></w:tcPr><w:p wsp:rsidR="005B5E1E" wsp:rsidRPr="00E434D3" wsp:rsidRDefault="005B5E1E" wsp:rsidP="00EB653E"><w:pPr><w:ind w:first-line="284"/><w:rPr><w:i/><w:sz w:val="20"/><w:lang w:fareast="EN-US"/></w:rPr></w:pPr><w:r><w:rPr><w:i/><w:sz w:val="20"/><w:lang w:fareast="EN-US"/></w:rPr><w:t>CM vs. SS</w:t></w:r></w:p></w:tc><w:tc><w:tcPr><w:tcW w:w="1134" w:type="dxa"/></w:tcPr><w:p wsp:rsidR="005B5E1E" wsp:rsidRPr="00E434D3" wsp:rsidRDefault="005B5E1E" wsp:rsidP="00EB653E"><w:pPr><w:ind w:first-line="284"/><w:rPr><w:sz w:val="20"/><w:lang w:fareast="EN-US"/></w:rPr></w:pPr><w:r wsp:rsidRPr="00E434D3"><w:rPr><w:sz w:val="20"/><w:lang w:fareast="EN-US"/></w:rPr><w:t>ns</w:t></w:r></w:p></w:tc><w:tc><w:tcPr><w:tcW w:w="851" w:type="dxa"/></w:tcPr><w:p wsp:rsidR="005B5E1E" wsp:rsidRPr="00E434D3" wsp:rsidRDefault="005B5E1E" wsp:rsidP="00EB653E"><w:pPr><w:rPr><w:sz w:val="20"/><w:lang w:fareast="EN-US"/></w:rPr></w:pPr><w:r wsp:rsidRPr="00E434D3"><w:rPr><w:sz w:val="20"/><w:lang w:fareast="EN-US"/></w:rPr><w:t>P&gt;0.05</w:t></w:r></w:p></w:tc><w:tc><w:tcPr><w:tcW w:w="1134" w:type="dxa"/></w:tcPr><w:p wsp:rsidR="005B5E1E" wsp:rsidRPr="00E434D3" wsp:rsidRDefault="005B5E1E" wsp:rsidP="00EB653E"><w:pPr><w:ind w:first-line="284"/><w:rPr><w:sz w:val="20"/><w:lang w:fareast="EN-US"/></w:rPr></w:pPr><w:r wsp:rsidRPr="00E434D3"><w:rPr><w:sz w:val="20"/><w:lang w:fareast="EN-US"/></w:rPr><w:t>ns</w:t></w:r></w:p></w:tc><w:tc><w:tcPr><w:tcW w:w="850" w:type="dxa"/></w:tcPr><w:p wsp:rsidR="005B5E1E" wsp:rsidRPr="00E434D3" wsp:rsidRDefault="005B5E1E" wsp:rsidP="00EB653E"><w:pPr><w:rPr><w:sz w:val="20"/><w:lang w:fareast="EN-US"/></w:rPr></w:pPr><w:r wsp:rsidRPr="00E434D3"><w:rPr><w:sz w:val="20"/><w:lang w:fareast="EN-US"/></w:rPr><w:t>P&gt;0.05</w:t></w:r></w:p></w:tc><w:tc><w:tcPr><w:tcW w:w="1134" w:type="dxa"/></w:tcPr><w:p wsp:rsidR="005B5E1E" wsp:rsidRPr="00E434D3" wsp:rsidRDefault="005B5E1E" wsp:rsidP="00EB653E"><w:pPr><w:ind w:first-line="284"/><w:rPr><w:sz w:val="20"/><w:lang w:fareast="EN-US"/></w:rPr></w:pPr><w:r wsp:rsidRPr="00E434D3"><w:rPr><w:sz w:val="20"/><w:lang w:fareast="EN-US"/></w:rPr><w:t>ns</w:t></w:r></w:p></w:tc><w:tc><w:tcPr><w:tcW w:w="851" w:type="dxa"/></w:tcPr><w:p wsp:rsidR="005B5E1E" wsp:rsidRPr="00E434D3" wsp:rsidRDefault="005B5E1E" wsp:rsidP="00EB653E"><w:pPr><w:rPr><w:sz w:val="20"/><w:lang w:fareast="EN-US"/></w:rPr></w:pPr><w:r wsp:rsidRPr="00E434D3"><w:rPr><w:sz w:val="20"/><w:lang w:fareast="EN-US"/></w:rPr><w:t>P&gt;0.05</w:t></w:r></w:p></w:tc><w:tc><w:tcPr><w:tcW w:w="1134" w:type="dxa"/></w:tcPr><w:p wsp:rsidR="005B5E1E" wsp:rsidRPr="00E434D3" wsp:rsidRDefault="005B5E1E" wsp:rsidP="00EB653E"><w:pPr><w:ind w:first-line="284"/><w:rPr><w:sz w:val="20"/><w:lang w:fareast="EN-US"/></w:rPr></w:pPr><w:r wsp:rsidRPr="00E434D3"><w:rPr><w:sz w:val="20"/><w:lang w:fareast="EN-US"/></w:rPr><w:t>ns</w:t></w:r></w:p></w:tc><w:tc><w:tcPr><w:tcW w:w="852" w:type="dxa"/></w:tcPr><w:p wsp:rsidR="005B5E1E" wsp:rsidRPr="00E434D3" wsp:rsidRDefault="005B5E1E" wsp:rsidP="00EB653E"><w:pPr><w:rPr><w:sz w:val="20"/><w:lang w:fareast="EN-US"/></w:rPr></w:pPr><w:r wsp:rsidRPr="00E434D3"><w:rPr><w:sz w:val="20"/><w:lang w:fareast="EN-US"/></w:rPr><w:t>P&gt;0.05</w:t></w:r></w:p></w:tc></w:tr><w:tr wsp:rsidR="005B5E1E" wsp:rsidRPr="00E434D3" wsp:rsidTr="00EB653E"><w:trPr><w:tblHeader/><w:jc w:val="center"/></w:trPr><w:tc><w:tcPr><w:tcW w:w="1463" w:type="dxa"/></w:tcPr><w:p wsp:rsidR="005B5E1E" wsp:rsidRPr="00B36BBA" wsp:rsidRDefault="005B5E1E" wsp:rsidP="00EB653E"><w:pPr><w:ind w:first-line="284"/><w:rPr><w:i/><w:sz w:val="20"/><w:lang w:fareast="EN-US"/></w:rPr></w:pPr><w:r><w:rPr><w:i/><w:sz w:val="20"/><w:lang w:fareast="EN-US"/></w:rPr><w:t>CM vs. IB</w:t></w:r></w:p></w:tc><w:tc><w:tcPr><w:tcW w:w="1134" w:type="dxa"/></w:tcPr><w:p wsp:rsidR="005B5E1E" wsp:rsidRPr="00E434D3" wsp:rsidRDefault="005B5E1E" wsp:rsidP="00EB653E"><w:pPr><w:ind w:first-line="284"/><w:rPr><w:sz w:val="20"/><w:lang w:fareast="EN-US"/></w:rPr></w:pPr><w:r wsp:rsidRPr="00E434D3"><w:rPr><w:sz w:val="20"/><w:lang w:fareast="EN-US"/></w:rPr><w:t>ns</w:t></w:r></w:p></w:tc><w:tc><w:tcPr><w:tcW w:w="851" w:type="dxa"/></w:tcPr><w:p wsp:rsidR="005B5E1E" wsp:rsidRPr="00E434D3" wsp:rsidRDefault="005B5E1E" wsp:rsidP="00EB653E"><w:pPr><w:rPr><w:sz w:val="20"/><w:lang w:fareast="EN-US"/></w:rPr></w:pPr><w:r wsp:rsidRPr="00E434D3"><w:rPr><w:sz w:val="20"/><w:lang w:fareast="EN-US"/></w:rPr><w:t>P&gt;0.05</w:t></w:r></w:p></w:tc><w:tc><w:tcPr><w:tcW w:w="1134" w:type="dxa"/></w:tcPr><w:p wsp:rsidR="005B5E1E" wsp:rsidRPr="00E434D3" wsp:rsidRDefault="005B5E1E" wsp:rsidP="00EB653E"><w:pPr><w:ind w:first-line="284"/><w:rPr><w:sz w:val="20"/><w:lang w:fareast="EN-US"/></w:rPr></w:pPr><w:r wsp:rsidRPr="00E434D3"><w:rPr><w:sz w:val="20"/><w:lang w:fareast="EN-US"/></w:rPr><w:t>ns</w:t></w:r></w:p></w:tc><w:tc><w:tcPr><w:tcW w:w="850" w:type="dxa"/></w:tcPr><w:p wsp:rsidR="005B5E1E" wsp:rsidRPr="00E434D3" wsp:rsidRDefault="005B5E1E" wsp:rsidP="00EB653E"><w:pPr><w:rPr><w:sz w:val="20"/><w:lang w:fareast="EN-US"/></w:rPr></w:pPr><w:r wsp:rsidRPr="00E434D3"><w:rPr><w:sz w:val="20"/><w:lang w:fareast="EN-US"/></w:rPr><w:t>P&gt;0.05</w:t></w:r></w:p></w:tc><w:tc><w:tcPr><w:tcW w:w="1134" w:type="dxa"/></w:tcPr><w:p wsp:rsidR="005B5E1E" wsp:rsidRPr="00E434D3" wsp:rsidRDefault="005B5E1E" wsp:rsidP="00EB653E"><w:pPr><w:ind w:first-line="284"/><w:rPr><w:sz w:val="20"/><w:lang w:fareast="EN-US"/></w:rPr></w:pPr><w:r wsp:rsidRPr="00E434D3"><w:rPr><w:sz w:val="20"/><w:lang w:fareast="EN-US"/></w:rPr><w:t>ns</w:t></w:r></w:p></w:tc><w:tc><w:tcPr><w:tcW w:w="851" w:type="dxa"/></w:tcPr><w:p wsp:rsidR="005B5E1E" wsp:rsidRPr="00E434D3" wsp:rsidRDefault="005B5E1E" wsp:rsidP="00EB653E"><w:pPr><w:rPr><w:sz w:val="20"/><w:lang w:fareast="EN-US"/></w:rPr></w:pPr><w:r wsp:rsidRPr="00E434D3"><w:rPr><w:sz w:val="20"/><w:lang w:fareast="EN-US"/></w:rPr><w:t>P&gt;0.05</w:t></w:r></w:p></w:tc><w:tc><w:tcPr><w:tcW w:w="1134" w:type="dxa"/></w:tcPr><w:p wsp:rsidR="005B5E1E" wsp:rsidRPr="00E434D3" wsp:rsidRDefault="005B5E1E" wsp:rsidP="00EB653E"><w:pPr><w:ind w:first-line="284"/><w:rPr><w:sz w:val="20"/><w:lang w:fareast="EN-US"/></w:rPr></w:pPr><w:r wsp:rsidRPr="00E434D3"><w:rPr><w:sz w:val="20"/><w:lang w:fareast="EN-US"/></w:rPr><w:t>ns</w:t></w:r></w:p></w:tc><w:tc><w:tcPr><w:tcW w:w="852" w:type="dxa"/></w:tcPr><w:p wsp:rsidR="005B5E1E" wsp:rsidRPr="00E434D3" wsp:rsidRDefault="005B5E1E" wsp:rsidP="00EB653E"><w:pPr><w:rPr><w:sz w:val="20"/><w:lang w:fareast="EN-US"/></w:rPr></w:pPr><w:r wsp:rsidRPr="00E434D3"><w:rPr><w:sz w:val="20"/><w:lang w:fareast="EN-US"/></w:rPr><w:t>P&gt;0.05</w:t></w:r></w:p></w:tc></w:tr><w:tr wsp:rsidR="005B5E1E" wsp:rsidRPr="00E434D3" wsp:rsidTr="00EB653E"><w:trPr><w:tblHeader/><w:jc w:val="center"/></w:trPr><w:tc><w:tcPr><w:tcW w:w="1463" w:type="dxa"/></w:tcPr><w:p wsp:rsidR="005B5E1E" wsp:rsidRPr="00B36BBA" wsp:rsidRDefault="00577B9C" wsp:rsidP="00EB653E"><w:pPr><w:ind w:first-line="284"/><w:rPr><w:i/><w:sz w:val="20"/><w:lang w:fareast="EN-US"/></w:rPr></w:pPr><w:r><w:rPr><w:i/><w:sz w:val="20"/><w:lang w:fareast="EN-US"/></w:rPr><w:t>AH vs. AS</w:t></w:r></w:p></w:tc><w:tc><w:tcPr><w:tcW w:w="1134" w:type="dxa"/></w:tcPr><w:p wsp:rsidR="005B5E1E" wsp:rsidRPr="00CB078B" wsp:rsidRDefault="005B5E1E" wsp:rsidP="00EB653E"><w:pPr><w:ind w:first-line="284"/><w:rPr><w:sz w:val="20"/><w:lang w:fareast="EN-US"/></w:rPr></w:pPr><w:r wsp:rsidRPr="00CB078B"><w:rPr><w:sz w:val="20"/><w:lang w:fareast="EN-US"/></w:rPr><w:t>ns</w:t></w:r></w:p></w:tc><w:tc><w:tcPr><w:tcW w:w="851" w:type="dxa"/></w:tcPr><w:p wsp:rsidR="005B5E1E" wsp:rsidRPr="00CB078B" wsp:rsidRDefault="005B5E1E" wsp:rsidP="00EB653E"><w:pPr><w:rPr><w:sz w:val="20"/><w:lang w:fareast="EN-US"/></w:rPr></w:pPr><w:r wsp:rsidRPr="00CB078B"><w:rPr><w:sz w:val="20"/><w:lang w:fareast="EN-US"/></w:rPr><w:t>P&gt;0.05</w:t></w:r></w:p></w:tc><w:tc><w:tcPr><w:tcW w:w="1134" w:type="dxa"/></w:tcPr><w:p wsp:rsidR="005B5E1E" wsp:rsidRPr="00CB078B" wsp:rsidRDefault="005B5E1E" wsp:rsidP="00EB653E"><w:pPr><w:ind w:first-line="284"/><w:rPr><w:sz w:val="20"/><w:lang w:fareast="EN-US"/></w:rPr></w:pPr><w:r wsp:rsidRPr="00CB078B"><w:rPr><w:sz w:val="20"/><w:lang w:fareast="EN-US"/></w:rPr><w:t>ns</w:t></w:r></w:p></w:tc><w:tc><w:tcPr><w:tcW w:w="850" w:type="dxa"/></w:tcPr><w:p wsp:rsidR="005B5E1E" wsp:rsidRPr="00CB078B" wsp:rsidRDefault="005B5E1E" wsp:rsidP="00EB653E"><w:pPr><w:rPr><w:sz w:val="20"/><w:lang w:fareast="EN-US"/></w:rPr></w:pPr><w:r wsp:rsidRPr="00CB078B"><w:rPr><w:sz w:val="20"/><w:lang w:fareast="EN-US"/></w:rPr><w:t>P&gt;0.05</w:t></w:r></w:p></w:tc><w:tc><w:tcPr><w:tcW w:w="1134" w:type="dxa"/></w:tcPr><w:p wsp:rsidR="005B5E1E" wsp:rsidRPr="00CB078B" wsp:rsidRDefault="005B5E1E" wsp:rsidP="00EB653E"><w:pPr><w:ind w:first-line="284"/><w:rPr><w:sz w:val="20"/><w:lang w:fareast="EN-US"/></w:rPr></w:pPr><w:r wsp:rsidRPr="00CB078B"><w:rPr><w:sz w:val="20"/><w:lang w:fareast="EN-US"/></w:rPr><w:t>ns</w:t></w:r></w:p></w:tc><w:tc><w:tcPr><w:tcW w:w="851" w:type="dxa"/></w:tcPr><w:p wsp:rsidR="005B5E1E" wsp:rsidRPr="00CB078B" wsp:rsidRDefault="005B5E1E" wsp:rsidP="00EB653E"><w:pPr><w:rPr><w:sz w:val="20"/><w:lang w:fareast="EN-US"/></w:rPr></w:pPr><w:r wsp:rsidRPr="00CB078B"><w:rPr><w:sz w:val="20"/><w:lang w:fareast="EN-US"/></w:rPr><w:t>P&gt;0.05</w:t></w:r></w:p></w:tc><w:tc><w:tcPr><w:tcW w:w="1134" w:type="dxa"/></w:tcPr><w:p wsp:rsidR="005B5E1E" wsp:rsidRPr="00CB078B" wsp:rsidRDefault="005B5E1E" wsp:rsidP="00EB653E"><w:pPr><w:ind w:first-line="284"/><w:rPr><w:sz w:val="20"/><w:lang w:fareast="EN-US"/></w:rPr></w:pPr><w:r wsp:rsidRPr="00CB078B"><w:rPr><w:sz w:val="20"/><w:lang w:fareast="EN-US"/></w:rPr><w:t>ns</w:t></w:r></w:p></w:tc><w:tc><w:tcPr><w:tcW w:w="852" w:type="dxa"/></w:tcPr><w:p wsp:rsidR="005B5E1E" wsp:rsidRPr="00CB078B" wsp:rsidRDefault="005B5E1E" wsp:rsidP="00EB653E"><w:pPr><w:rPr><w:sz w:val="20"/><w:lang w:fareast="EN-US"/></w:rPr></w:pPr><w:r wsp:rsidRPr="00CB078B"><w:rPr><w:sz w:val="20"/><w:lang w:fareast="EN-US"/></w:rPr><w:t>P&gt;0.05</w:t></w:r></w:p></w:tc></w:tr><w:tr wsp:rsidR="005B5E1E" wsp:rsidRPr="00E434D3" wsp:rsidTr="00EB653E"><w:trPr><w:tblHeader/><w:jc w:val="center"/></w:trPr><w:tc><w:tcPr><w:tcW w:w="1463" w:type="dxa"/></w:tcPr><w:p wsp:rsidR="005B5E1E" wsp:rsidRPr="00B36BBA" wsp:rsidRDefault="005B5E1E" wsp:rsidP="00EB653E"><w:pPr><w:ind w:first-line="284"/><w:rPr><w:i/><w:sz w:val="20"/><w:lang w:fareast="EN-US"/></w:rPr></w:pPr><w:r><w:rPr><w:i/><w:sz w:val="20"/><w:lang w:fareast="EN-US"/></w:rPr><w:t>AH vs. SV</w:t></w:r></w:p></w:tc><w:tc><w:tcPr><w:tcW w:w="1134" w:type="dxa"/></w:tcPr><w:p wsp:rsidR="005B5E1E" wsp:rsidRPr="00CB078B" wsp:rsidRDefault="005B5E1E" wsp:rsidP="00EB653E"><w:pPr><w:ind w:first-line="284"/><w:rPr><w:sz w:val="20"/><w:lang w:fareast="EN-US"/></w:rPr></w:pPr><w:r wsp:rsidRPr="00CB078B"><w:rPr><w:sz w:val="20"/><w:lang w:fareast="EN-US"/></w:rPr><w:t>ns</w:t></w:r></w:p></w:tc><w:tc><w:tcPr><w:tcW w:w="851" w:type="dxa"/></w:tcPr><w:p wsp:rsidR="005B5E1E" wsp:rsidRPr="00CB078B" wsp:rsidRDefault="005B5E1E" wsp:rsidP="00EB653E"><w:pPr><w:rPr><w:sz w:val="20"/><w:lang w:fareast="EN-US"/></w:rPr></w:pPr><w:r wsp:rsidRPr="00CB078B"><w:rPr><w:sz w:val="20"/><w:lang w:fareast="EN-US"/></w:rPr><w:t>P&gt;0.05</w:t></w:r></w:p></w:tc><w:tc><w:tcPr><w:tcW w:w="1134" w:type="dxa"/></w:tcPr><w:p wsp:rsidR="005B5E1E" wsp:rsidRPr="00CB078B" wsp:rsidRDefault="005B5E1E" wsp:rsidP="00EB653E"><w:pPr><w:ind w:first-line="284"/><w:rPr><w:sz w:val="20"/><w:lang w:fareast="EN-US"/></w:rPr></w:pPr><w:r wsp:rsidRPr="00CB078B"><w:rPr><w:sz w:val="20"/><w:lang w:fareast="EN-US"/></w:rPr><w:t>ns</w:t></w:r></w:p></w:tc><w:tc><w:tcPr><w:tcW w:w="850" w:type="dxa"/></w:tcPr><w:p wsp:rsidR="005B5E1E" wsp:rsidRPr="00CB078B" wsp:rsidRDefault="005B5E1E" wsp:rsidP="00EB653E"><w:pPr><w:rPr><w:sz w:val="20"/><w:lang w:fareast="EN-US"/></w:rPr></w:pPr><w:r wsp:rsidRPr="00CB078B"><w:rPr><w:sz w:val="20"/><w:lang w:fareast="EN-US"/></w:rPr><w:t>P&gt;0.05</w:t></w:r></w:p></w:tc><w:tc><w:tcPr><w:tcW w:w="1134" w:type="dxa"/></w:tcPr><w:p wsp:rsidR="005B5E1E" wsp:rsidRPr="00CB078B" wsp:rsidRDefault="005B5E1E" wsp:rsidP="00EB653E"><w:pPr><w:ind w:first-line="284"/><w:rPr><w:sz w:val="20"/><w:lang w:fareast="EN-US"/></w:rPr></w:pPr><w:r wsp:rsidRPr="00CB078B"><w:rPr><w:sz w:val="20"/><w:lang w:fareast="EN-US"/></w:rPr><w:t>ns</w:t></w:r></w:p></w:tc><w:tc><w:tcPr><w:tcW w:w="851" w:type="dxa"/></w:tcPr><w:p wsp:rsidR="005B5E1E" wsp:rsidRPr="00CB078B" wsp:rsidRDefault="005B5E1E" wsp:rsidP="00EB653E"><w:pPr><w:rPr><w:sz w:val="20"/><w:lang w:fareast="EN-US"/></w:rPr></w:pPr><w:r wsp:rsidRPr="00CB078B"><w:rPr><w:sz w:val="20"/><w:lang w:fareast="EN-US"/></w:rPr><w:t>P&gt;0.05</w:t></w:r></w:p></w:tc><w:tc><w:tcPr><w:tcW w:w="1134" w:type="dxa"/></w:tcPr><w:p wsp:rsidR="005B5E1E" wsp:rsidRPr="00CB078B" wsp:rsidRDefault="005B5E1E" wsp:rsidP="00EB653E"><w:pPr><w:ind w:first-line="284"/><w:rPr><w:sz w:val="20"/><w:lang w:fareast="EN-US"/></w:rPr></w:pPr><w:r wsp:rsidRPr="00CB078B"><w:rPr><w:sz w:val="20"/><w:lang w:fareast="EN-US"/></w:rPr><w:t>ns</w:t></w:r></w:p></w:tc><w:tc><w:tcPr><w:tcW w:w="852" w:type="dxa"/></w:tcPr><w:p wsp:rsidR="005B5E1E" wsp:rsidRPr="00CB078B" wsp:rsidRDefault="005B5E1E" wsp:rsidP="00EB653E"><w:pPr><w:rPr><w:sz w:val="20"/><w:lang w:fareast="EN-US"/></w:rPr></w:pPr><w:r wsp:rsidRPr="00CB078B"><w:rPr><w:sz w:val="20"/><w:lang w:fareast="EN-US"/></w:rPr><w:t>P&gt;0.05</w:t></w:r></w:p></w:tc></w:tr><w:tr wsp:rsidR="005B5E1E" wsp:rsidRPr="00E434D3" wsp:rsidTr="00EB653E"><w:trPr><w:tblHeader/><w:jc w:val="center"/></w:trPr><w:tc><w:tcPr><w:tcW w:w="1463" w:type="dxa"/></w:tcPr><w:p wsp:rsidR="005B5E1E" wsp:rsidRPr="00CB078B" wsp:rsidRDefault="005B5E1E" wsp:rsidP="00EB653E"><w:pPr><w:ind w:first-line="284"/><w:rPr><w:i/><w:sz w:val="20"/><w:lang w:fareast="EN-US"/></w:rPr></w:pPr><w:r><w:rPr><w:i/><w:sz w:val="20"/><w:lang w:fareast="EN-US"/></w:rPr><w:t>AH vs. SS</w:t></w:r></w:p></w:tc><w:tc><w:tcPr><w:tcW w:w="1134" w:type="dxa"/></w:tcPr><w:p wsp:rsidR="005B5E1E" wsp:rsidRPr="00CB078B" wsp:rsidRDefault="005B5E1E" wsp:rsidP="00EB653E"><w:pPr><w:ind w:first-line="284"/><w:rPr><w:sz w:val="20"/><w:lang w:fareast="EN-US"/></w:rPr></w:pPr><w:r wsp:rsidRPr="00CB078B"><w:rPr><w:sz w:val="20"/><w:lang w:fareast="EN-US"/></w:rPr><w:t>ns</w:t></w:r></w:p></w:tc><w:tc><w:tcPr><w:tcW w:w="851" w:type="dxa"/></w:tcPr><w:p wsp:rsidR="005B5E1E" wsp:rsidRPr="00CB078B" wsp:rsidRDefault="005B5E1E" wsp:rsidP="00EB653E"><w:pPr><w:rPr><w:sz w:val="20"/><w:lang w:fareast="EN-US"/></w:rPr></w:pPr><w:r wsp:rsidRPr="00CB078B"><w:rPr><w:sz w:val="20"/><w:lang w:fareast="EN-US"/></w:rPr><w:t>P&gt;0.05</w:t></w:r></w:p></w:tc><w:tc><w:tcPr><w:tcW w:w="1134" w:type="dxa"/></w:tcPr><w:p wsp:rsidR="005B5E1E" wsp:rsidRPr="00CB078B" wsp:rsidRDefault="005B5E1E" wsp:rsidP="00EB653E"><w:pPr><w:ind w:first-line="284"/><w:rPr><w:sz w:val="20"/><w:lang w:fareast="EN-US"/></w:rPr></w:pPr><w:r wsp:rsidRPr="00CB078B"><w:rPr><w:sz w:val="20"/><w:lang w:fareast="EN-US"/></w:rPr><w:t>ns</w:t></w:r></w:p></w:tc><w:tc><w:tcPr><w:tcW w:w="850" w:type="dxa"/></w:tcPr><w:p wsp:rsidR="005B5E1E" wsp:rsidRPr="00CB078B" wsp:rsidRDefault="005B5E1E" wsp:rsidP="00EB653E"><w:pPr><w:rPr><w:sz w:val="20"/><w:lang w:fareast="EN-US"/></w:rPr></w:pPr><w:r wsp:rsidRPr="00CB078B"><w:rPr><w:sz w:val="20"/><w:lang w:fareast="EN-US"/></w:rPr><w:t>P&gt;0.05</w:t></w:r></w:p></w:tc><w:tc><w:tcPr><w:tcW w:w="1134" w:type="dxa"/></w:tcPr><w:p wsp:rsidR="005B5E1E" wsp:rsidRPr="00CB078B" wsp:rsidRDefault="005B5E1E" wsp:rsidP="00EB653E"><w:pPr><w:ind w:first-line="284"/><w:rPr><w:sz w:val="20"/><w:lang w:fareast="EN-US"/></w:rPr></w:pPr><w:r wsp:rsidRPr="00CB078B"><w:rPr><w:sz w:val="20"/><w:lang w:fareast="EN-US"/></w:rPr><w:t>ns</w:t></w:r></w:p></w:tc><w:tc><w:tcPr><w:tcW w:w="851" w:type="dxa"/></w:tcPr><w:p wsp:rsidR="005B5E1E" wsp:rsidRPr="00CB078B" wsp:rsidRDefault="005B5E1E" wsp:rsidP="00EB653E"><w:pPr><w:rPr><w:sz w:val="20"/><w:lang w:fareast="EN-US"/></w:rPr></w:pPr><w:r wsp:rsidRPr="00CB078B"><w:rPr><w:sz w:val="20"/><w:lang w:fareast="EN-US"/></w:rPr><w:t>P&gt;0.05</w:t></w:r></w:p></w:tc><w:tc><w:tcPr><w:tcW w:w="1134" w:type="dxa"/></w:tcPr><w:p wsp:rsidR="005B5E1E" wsp:rsidRPr="00CB078B" wsp:rsidRDefault="005B5E1E" wsp:rsidP="00EB653E"><w:pPr><w:ind w:first-line="284"/><w:rPr><w:sz w:val="20"/><w:lang w:fareast="EN-US"/></w:rPr></w:pPr><w:r wsp:rsidRPr="00CB078B"><w:rPr><w:sz w:val="20"/><w:lang w:fareast="EN-US"/></w:rPr><w:t>ns</w:t></w:r></w:p></w:tc><w:tc><w:tcPr><w:tcW w:w="852" w:type="dxa"/></w:tcPr><w:p wsp:rsidR="005B5E1E" wsp:rsidRPr="00CB078B" wsp:rsidRDefault="005B5E1E" wsp:rsidP="00EB653E"><w:pPr><w:rPr><w:sz w:val="20"/><w:lang w:fareast="EN-US"/></w:rPr></w:pPr><w:r wsp:rsidRPr="00CB078B"><w:rPr><w:sz w:val="20"/><w:lang w:fareast="EN-US"/></w:rPr><w:t>P&gt;0.05</w:t></w:r></w:p></w:tc></w:tr><w:tr wsp:rsidR="005B5E1E" wsp:rsidRPr="00E434D3" wsp:rsidTr="00EB653E"><w:trPr><w:tblHeader/><w:jc w:val="center"/></w:trPr><w:tc><w:tcPr><w:tcW w:w="1463" w:type="dxa"/></w:tcPr><w:p wsp:rsidR="005B5E1E" wsp:rsidRPr="00B36BBA" wsp:rsidRDefault="005B5E1E" wsp:rsidP="00EB653E"><w:pPr><w:ind w:first-line="284"/><w:rPr><w:i/><w:sz w:val="20"/><w:lang w:fareast="EN-US"/></w:rPr></w:pPr><w:r><w:rPr><w:i/><w:sz w:val="20"/><w:lang w:fareast="EN-US"/></w:rPr><w:t>AH vs. IB</w:t></w:r></w:p></w:tc><w:tc><w:tcPr><w:tcW w:w="1134" w:type="dxa"/></w:tcPr><w:p wsp:rsidR="005B5E1E" wsp:rsidRPr="00CB078B" wsp:rsidRDefault="005B5E1E" wsp:rsidP="00EB653E"><w:pPr><w:ind w:first-line="284"/><w:rPr><w:sz w:val="20"/><w:lang w:fareast="EN-US"/></w:rPr></w:pPr><w:r wsp:rsidRPr="00CB078B"><w:rPr><w:sz w:val="20"/><w:lang w:fareast="EN-US"/></w:rPr><w:t>ns</w:t></w:r></w:p></w:tc><w:tc><w:tcPr><w:tcW w:w="851" w:type="dxa"/></w:tcPr><w:p wsp:rsidR="005B5E1E" wsp:rsidRPr="00CB078B" wsp:rsidRDefault="005B5E1E" wsp:rsidP="00EB653E"><w:pPr><w:rPr><w:sz w:val="20"/><w:lang w:fareast="EN-US"/></w:rPr></w:pPr><w:r wsp:rsidRPr="00CB078B"><w:rPr><w:sz w:val="20"/><w:lang w:fareast="EN-US"/></w:rPr><w:t>P&gt;0.05</w:t></w:r></w:p></w:tc><w:tc><w:tcPr><w:tcW w:w="1134" w:type="dxa"/></w:tcPr><w:p wsp:rsidR="005B5E1E" wsp:rsidRPr="00CB078B" wsp:rsidRDefault="005B5E1E" wsp:rsidP="00EB653E"><w:pPr><w:ind w:first-line="284"/><w:rPr><w:sz w:val="20"/><w:lang w:fareast="EN-US"/></w:rPr></w:pPr><w:r wsp:rsidRPr="00CB078B"><w:rPr><w:sz w:val="20"/><w:lang w:fareast="EN-US"/></w:rPr><w:t>ns</w:t></w:r></w:p></w:tc><w:tc><w:tcPr><w:tcW w:w="850" w:type="dxa"/></w:tcPr><w:p wsp:rsidR="005B5E1E" wsp:rsidRPr="00CB078B" wsp:rsidRDefault="005B5E1E" wsp:rsidP="00EB653E"><w:pPr><w:rPr><w:sz w:val="20"/><w:lang w:fareast="EN-US"/></w:rPr></w:pPr><w:r wsp:rsidRPr="00CB078B"><w:rPr><w:sz w:val="20"/><w:lang w:fareast="EN-US"/></w:rPr><w:t>P&gt;0.05</w:t></w:r></w:p></w:tc><w:tc><w:tcPr><w:tcW w:w="1134" w:type="dxa"/></w:tcPr><w:p wsp:rsidR="005B5E1E" wsp:rsidRPr="00CB078B" wsp:rsidRDefault="005B5E1E" wsp:rsidP="00EB653E"><w:pPr><w:ind w:first-line="284"/><w:rPr><w:sz w:val="20"/><w:lang w:fareast="EN-US"/></w:rPr></w:pPr><w:r wsp:rsidRPr="00CB078B"><w:rPr><w:sz w:val="20"/><w:lang w:fareast="EN-US"/></w:rPr><w:t>ns</w:t></w:r></w:p></w:tc><w:tc><w:tcPr><w:tcW w:w="851" w:type="dxa"/></w:tcPr><w:p wsp:rsidR="005B5E1E" wsp:rsidRPr="00CB078B" wsp:rsidRDefault="005B5E1E" wsp:rsidP="00EB653E"><w:pPr><w:rPr><w:sz w:val="20"/><w:lang w:fareast="EN-US"/></w:rPr></w:pPr><w:r wsp:rsidRPr="00CB078B"><w:rPr><w:sz w:val="20"/><w:lang w:fareast="EN-US"/></w:rPr><w:t>P&gt;0.05</w:t></w:r></w:p></w:tc><w:tc><w:tcPr><w:tcW w:w="1134" w:type="dxa"/></w:tcPr><w:p wsp:rsidR="005B5E1E" wsp:rsidRPr="00CB078B" wsp:rsidRDefault="005B5E1E" wsp:rsidP="00EB653E"><w:pPr><w:ind w:first-line="284"/><w:rPr><w:sz w:val="20"/><w:lang w:fareast="EN-US"/></w:rPr></w:pPr><w:r wsp:rsidRPr="00CB078B"><w:rPr><w:sz w:val="20"/><w:lang w:fareast="EN-US"/></w:rPr><w:t>ns</w:t></w:r></w:p></w:tc><w:tc><w:tcPr><w:tcW w:w="852" w:type="dxa"/></w:tcPr><w:p wsp:rsidR="005B5E1E" wsp:rsidRPr="00CB078B" wsp:rsidRDefault="005B5E1E" wsp:rsidP="00EB653E"><w:pPr><w:rPr><w:sz w:val="20"/><w:lang w:fareast="EN-US"/></w:rPr></w:pPr><w:r wsp:rsidRPr="00CB078B"><w:rPr><w:sz w:val="20"/><w:lang w:fareast="EN-US"/></w:rPr><w:t>P&gt;0.05</w:t></w:r></w:p></w:tc></w:tr><w:tr wsp:rsidR="005B5E1E" wsp:rsidRPr="00E434D3" wsp:rsidTr="00EB653E"><w:trPr><w:tblHeader/><w:jc w:val="center"/></w:trPr><w:tc><w:tcPr><w:tcW w:w="1463" w:type="dxa"/></w:tcPr><w:p wsp:rsidR="005B5E1E" wsp:rsidRPr="00B36BBA" wsp:rsidRDefault="00577B9C" wsp:rsidP="00EB653E"><w:pPr><w:ind w:first-line="284"/><w:rPr><w:i/><w:sz w:val="20"/><w:lang w:fareast="EN-US"/></w:rPr></w:pPr><w:r><w:rPr><w:i/><w:sz w:val="20"/><w:lang w:fareast="EN-US"/></w:rPr><w:t>AS</w:t></w:r><w:r wsp:rsidR="005B5E1E"><w:rPr><w:i/><w:sz w:val="20"/><w:lang w:fareast="EN-US"/></w:rPr><w:t> vs. SV</w:t></w:r></w:p></w:tc><w:tc><w:tcPr><w:tcW w:w="1134" w:type="dxa"/></w:tcPr><w:p wsp:rsidR="005B5E1E" wsp:rsidRPr="00CB078B" wsp:rsidRDefault="005B5E1E" wsp:rsidP="00EB653E"><w:pPr><w:ind w:first-line="284"/><w:rPr><w:sz w:val="20"/><w:lang w:fareast="EN-US"/></w:rPr></w:pPr><w:r wsp:rsidRPr="00CB078B"><w:rPr><w:sz w:val="20"/><w:lang w:fareast="EN-US"/></w:rPr><w:t>ns</w:t></w:r></w:p></w:tc><w:tc><w:tcPr><w:tcW w:w="851" w:type="dxa"/></w:tcPr><w:p wsp:rsidR="005B5E1E" wsp:rsidRPr="00CB078B" wsp:rsidRDefault="005B5E1E" wsp:rsidP="00EB653E"><w:pPr><w:rPr><w:sz w:val="20"/><w:lang w:fareast="EN-US"/></w:rPr></w:pPr><w:r wsp:rsidRPr="00CB078B"><w:rPr><w:sz w:val="20"/><w:lang w:fareast="EN-US"/></w:rPr><w:t>P&gt;0.05</w:t></w:r></w:p></w:tc><w:tc><w:tcPr><w:tcW w:w="1134" w:type="dxa"/></w:tcPr><w:p wsp:rsidR="005B5E1E" wsp:rsidRPr="00CB078B" wsp:rsidRDefault="005B5E1E" wsp:rsidP="00EB653E"><w:pPr><w:ind w:first-line="284"/><w:rPr><w:sz w:val="20"/><w:lang w:fareast="EN-US"/></w:rPr></w:pPr><w:r wsp:rsidRPr="00CB078B"><w:rPr><w:sz w:val="20"/><w:lang w:fareast="EN-US"/></w:rPr><w:t>ns</w:t></w:r></w:p></w:tc><w:tc><w:tcPr><w:tcW w:w="850" w:type="dxa"/></w:tcPr><w:p wsp:rsidR="005B5E1E" wsp:rsidRPr="00CB078B" wsp:rsidRDefault="005B5E1E" wsp:rsidP="00EB653E"><w:pPr><w:rPr><w:sz w:val="20"/><w:lang w:fareast="EN-US"/></w:rPr></w:pPr><w:r wsp:rsidRPr="00CB078B"><w:rPr><w:sz w:val="20"/><w:lang w:fareast="EN-US"/></w:rPr><w:t>P&gt;0.05</w:t></w:r></w:p></w:tc><w:tc><w:tcPr><w:tcW w:w="1134" w:type="dxa"/></w:tcPr><w:p wsp:rsidR="005B5E1E" wsp:rsidRPr="00CB078B" wsp:rsidRDefault="005B5E1E" wsp:rsidP="00EB653E"><w:pPr><w:ind w:first-line="284"/><w:rPr><w:sz w:val="20"/><w:lang w:fareast="EN-US"/></w:rPr></w:pPr><w:r wsp:rsidRPr="00CB078B"><w:rPr><w:sz w:val="20"/><w:lang w:fareast="EN-US"/></w:rPr><w:t>ns</w:t></w:r></w:p></w:tc><w:tc><w:tcPr><w:tcW w:w="851" w:type="dxa"/></w:tcPr><w:p wsp:rsidR="005B5E1E" wsp:rsidRPr="00CB078B" wsp:rsidRDefault="005B5E1E" wsp:rsidP="00EB653E"><w:pPr><w:rPr><w:sz w:val="20"/><w:lang w:fareast="EN-US"/></w:rPr></w:pPr><w:r wsp:rsidRPr="00CB078B"><w:rPr><w:sz w:val="20"/><w:lang w:fareast="EN-US"/></w:rPr><w:t>P&gt;0.05</w:t></w:r></w:p></w:tc><w:tc><w:tcPr><w:tcW w:w="1134" w:type="dxa"/></w:tcPr><w:p wsp:rsidR="005B5E1E" wsp:rsidRPr="00CB078B" wsp:rsidRDefault="005B5E1E" wsp:rsidP="00EB653E"><w:pPr><w:ind w:first-line="284"/><w:rPr><w:sz w:val="20"/><w:lang w:fareast="EN-US"/></w:rPr></w:pPr><w:r wsp:rsidRPr="00CB078B"><w:rPr><w:sz w:val="20"/><w:lang w:fareast="EN-US"/></w:rPr><w:t>ns</w:t></w:r></w:p></w:tc><w:tc><w:tcPr><w:tcW w:w="852" w:type="dxa"/></w:tcPr><w:p wsp:rsidR="005B5E1E" wsp:rsidRPr="00CB078B" wsp:rsidRDefault="005B5E1E" wsp:rsidP="00EB653E"><w:pPr><w:rPr><w:sz w:val="20"/><w:lang w:fareast="EN-US"/></w:rPr></w:pPr><w:r wsp:rsidRPr="00CB078B"><w:rPr><w:sz w:val="20"/><w:lang w:fareast="EN-US"/></w:rPr><w:t>P&gt;0.05</w:t></w:r></w:p></w:tc></w:tr><w:tr wsp:rsidR="005B5E1E" wsp:rsidRPr="00E434D3" wsp:rsidTr="00EB653E"><w:trPr><w:tblHeader/><w:jc w:val="center"/></w:trPr><w:tc><w:tcPr><w:tcW w:w="1463" w:type="dxa"/></w:tcPr><w:p wsp:rsidR="005B5E1E" wsp:rsidRPr="00CB078B" wsp:rsidRDefault="00577B9C" wsp:rsidP="00EB653E"><w:pPr><w:ind w:first-line="284"/><w:rPr><w:i/><w:sz w:val="20"/><w:lang w:fareast="EN-US"/></w:rPr></w:pPr><w:r><w:rPr><w:i/><w:sz w:val="20"/><w:lang w:fareast="EN-US"/></w:rPr><w:t>AS</w:t></w:r><w:r wsp:rsidR="005B5E1E"><w:rPr><w:i/><w:sz w:val="20"/><w:lang w:fareast="EN-US"/></w:rPr><w:t> vs. SS</w:t></w:r></w:p></w:tc><w:tc><w:tcPr><w:tcW w:w="1134" w:type="dxa"/></w:tcPr><w:p wsp:rsidR="005B5E1E" wsp:rsidRPr="00CB078B" wsp:rsidRDefault="005B5E1E" wsp:rsidP="00EB653E"><w:pPr><w:ind w:first-line="284"/><w:rPr><w:sz w:val="20"/><w:lang w:fareast="EN-US"/></w:rPr></w:pPr><w:r wsp:rsidRPr="00CB078B"><w:rPr><w:sz w:val="20"/><w:lang w:fareast="EN-US"/></w:rPr><w:t>ns</w:t></w:r></w:p></w:tc><w:tc><w:tcPr><w:tcW w:w="851" w:type="dxa"/></w:tcPr><w:p wsp:rsidR="005B5E1E" wsp:rsidRPr="00CB078B" wsp:rsidRDefault="005B5E1E" wsp:rsidP="00EB653E"><w:pPr><w:rPr><w:sz w:val="20"/><w:lang w:fareast="EN-US"/></w:rPr></w:pPr><w:r wsp:rsidRPr="00CB078B"><w:rPr><w:sz w:val="20"/><w:lang w:fareast="EN-US"/></w:rPr><w:t>P&gt;0.05</w:t></w:r></w:p></w:tc><w:tc><w:tcPr><w:tcW w:w="1134" w:type="dxa"/></w:tcPr><w:p wsp:rsidR="005B5E1E" wsp:rsidRPr="00CB078B" wsp:rsidRDefault="005B5E1E" wsp:rsidP="00EB653E"><w:pPr><w:ind w:first-line="284"/><w:rPr><w:sz w:val="20"/><w:lang w:fareast="EN-US"/></w:rPr></w:pPr><w:r wsp:rsidRPr="00CB078B"><w:rPr><w:sz w:val="20"/><w:lang w:fareast="EN-US"/></w:rPr><w:t>ns</w:t></w:r></w:p></w:tc><w:tc><w:tcPr><w:tcW w:w="850" w:type="dxa"/></w:tcPr><w:p wsp:rsidR="005B5E1E" wsp:rsidRPr="00CB078B" wsp:rsidRDefault="005B5E1E" wsp:rsidP="00EB653E"><w:pPr><w:rPr><w:sz w:val="20"/><w:lang w:fareast="EN-US"/></w:rPr></w:pPr><w:r wsp:rsidRPr="00CB078B"><w:rPr><w:sz w:val="20"/><w:lang w:fareast="EN-US"/></w:rPr><w:t>P&gt;0.05</w:t></w:r></w:p></w:tc><w:tc><w:tcPr><w:tcW w:w="1134" w:type="dxa"/></w:tcPr><w:p wsp:rsidR="005B5E1E" wsp:rsidRPr="00CB078B" wsp:rsidRDefault="005B5E1E" wsp:rsidP="00EB653E"><w:pPr><w:ind w:first-line="284"/><w:rPr><w:sz w:val="20"/><w:lang w:fareast="EN-US"/></w:rPr></w:pPr><w:r wsp:rsidRPr="00CB078B"><w:rPr><w:sz w:val="20"/><w:lang w:fareast="EN-US"/></w:rPr><w:t>ns</w:t></w:r></w:p></w:tc><w:tc><w:tcPr><w:tcW w:w="851" w:type="dxa"/></w:tcPr><w:p wsp:rsidR="005B5E1E" wsp:rsidRPr="00CB078B" wsp:rsidRDefault="005B5E1E" wsp:rsidP="00EB653E"><w:pPr><w:rPr><w:sz w:val="20"/><w:lang w:fareast="EN-US"/></w:rPr></w:pPr><w:r wsp:rsidRPr="00CB078B"><w:rPr><w:sz w:val="20"/><w:lang w:fareast="EN-US"/></w:rPr><w:t>P&gt;0.05</w:t></w:r></w:p></w:tc><w:tc><w:tcPr><w:tcW w:w="1134" w:type="dxa"/></w:tcPr><w:p wsp:rsidR="005B5E1E" wsp:rsidRPr="00CB078B" wsp:rsidRDefault="005B5E1E" wsp:rsidP="00EB653E"><w:pPr><w:ind w:first-line="284"/><w:rPr><w:sz w:val="20"/><w:lang w:fareast="EN-US"/></w:rPr></w:pPr><w:r wsp:rsidRPr="00CB078B"><w:rPr><w:sz w:val="20"/><w:lang w:fareast="EN-US"/></w:rPr><w:t>ns</w:t></w:r></w:p></w:tc><w:tc><w:tcPr><w:tcW w:w="852" w:type="dxa"/></w:tcPr><w:p wsp:rsidR="005B5E1E" wsp:rsidRPr="00CB078B" wsp:rsidRDefault="005B5E1E" wsp:rsidP="00EB653E"><w:pPr><w:rPr><w:sz w:val="20"/><w:lang w:fareast="EN-US"/></w:rPr></w:pPr><w:r wsp:rsidRPr="00CB078B"><w:rPr><w:sz w:val="20"/><w:lang w:fareast="EN-US"/></w:rPr><w:t>P&gt;0.05</w:t></w:r></w:p></w:tc></w:tr><w:tr wsp:rsidR="005B5E1E" wsp:rsidRPr="00E434D3" wsp:rsidTr="00EB653E"><w:trPr><w:tblHeader/><w:jc w:val="center"/></w:trPr><w:tc><w:tcPr><w:tcW w:w="1463" w:type="dxa"/></w:tcPr><w:p wsp:rsidR="005B5E1E" wsp:rsidRPr="00B36BBA" wsp:rsidRDefault="00577B9C" wsp:rsidP="00EB653E"><w:pPr><w:ind w:first-line="284"/><w:rPr><w:i/><w:sz w:val="20"/><w:lang w:fareast="EN-US"/></w:rPr></w:pPr><w:r><w:rPr><w:i/><w:sz w:val="20"/><w:lang w:fareast="EN-US"/></w:rPr><w:t>AS</w:t></w:r><w:r wsp:rsidR="005B5E1E"><w:rPr><w:i/><w:sz w:val="20"/><w:lang w:fareast="EN-US"/></w:rPr><w:t> vs. IB</w:t></w:r></w:p></w:tc><w:tc><w:tcPr><w:tcW w:w="1134" w:type="dxa"/></w:tcPr><w:p wsp:rsidR="005B5E1E" wsp:rsidRPr="00CB078B" wsp:rsidRDefault="005B5E1E" wsp:rsidP="00EB653E"><w:pPr><w:ind w:first-line="284"/><w:rPr><w:sz w:val="20"/><w:lang w:fareast="EN-US"/></w:rPr></w:pPr><w:r wsp:rsidRPr="00CB078B"><w:rPr><w:sz w:val="20"/><w:lang w:fareast="EN-US"/></w:rPr><w:t>ns</w:t></w:r></w:p></w:tc><w:tc><w:tcPr><w:tcW w:w="851" w:type="dxa"/></w:tcPr><w:p wsp:rsidR="005B5E1E" wsp:rsidRPr="00CB078B" wsp:rsidRDefault="005B5E1E" wsp:rsidP="00EB653E"><w:pPr><w:rPr><w:sz w:val="20"/><w:lang w:fareast="EN-US"/></w:rPr></w:pPr><w:r wsp:rsidRPr="00CB078B"><w:rPr><w:sz w:val="20"/><w:lang w:fareast="EN-US"/></w:rPr><w:t>P&gt;0.05</w:t></w:r></w:p></w:tc><w:tc><w:tcPr><w:tcW w:w="1134" w:type="dxa"/></w:tcPr><w:p wsp:rsidR="005B5E1E" wsp:rsidRPr="00CB078B" wsp:rsidRDefault="005B5E1E" wsp:rsidP="00EB653E"><w:pPr><w:ind w:first-line="284"/><w:rPr><w:sz w:val="20"/><w:lang w:fareast="EN-US"/></w:rPr></w:pPr><w:r wsp:rsidRPr="00CB078B"><w:rPr><w:sz w:val="20"/><w:lang w:fareast="EN-US"/></w:rPr><w:t>ns</w:t></w:r></w:p></w:tc><w:tc><w:tcPr><w:tcW w:w="850" w:type="dxa"/></w:tcPr><w:p wsp:rsidR="005B5E1E" wsp:rsidRPr="00CB078B" wsp:rsidRDefault="005B5E1E" wsp:rsidP="00EB653E"><w:pPr><w:rPr><w:sz w:val="20"/><w:lang w:fareast="EN-US"/></w:rPr></w:pPr><w:r wsp:rsidRPr="00CB078B"><w:rPr><w:sz w:val="20"/><w:lang w:fareast="EN-US"/></w:rPr><w:t>P&gt;0.05</w:t></w:r></w:p></w:tc><w:tc><w:tcPr><w:tcW w:w="1134" w:type="dxa"/></w:tcPr><w:p wsp:rsidR="005B5E1E" wsp:rsidRPr="00CB078B" wsp:rsidRDefault="005B5E1E" wsp:rsidP="00EB653E"><w:pPr><w:ind w:first-line="284"/><w:rPr><w:sz w:val="20"/><w:lang w:fareast="EN-US"/></w:rPr></w:pPr><w:r wsp:rsidRPr="00CB078B"><w:rPr><w:sz w:val="20"/><w:lang w:fareast="EN-US"/></w:rPr><w:t>ns</w:t></w:r></w:p></w:tc><w:tc><w:tcPr><w:tcW w:w="851" w:type="dxa"/></w:tcPr><w:p wsp:rsidR="005B5E1E" wsp:rsidRPr="00CB078B" wsp:rsidRDefault="005B5E1E" wsp:rsidP="00EB653E"><w:pPr><w:rPr><w:sz w:val="20"/><w:lang w:fareast="EN-US"/></w:rPr></w:pPr><w:r wsp:rsidRPr="00CB078B"><w:rPr><w:sz w:val="20"/><w:lang w:fareast="EN-US"/></w:rPr><w:t>P&gt;0.05</w:t></w:r></w:p></w:tc><w:tc><w:tcPr><w:tcW w:w="1134" w:type="dxa"/></w:tcPr><w:p wsp:rsidR="005B5E1E" wsp:rsidRPr="00CB078B" wsp:rsidRDefault="005B5E1E" wsp:rsidP="00EB653E"><w:pPr><w:ind w:first-line="284"/><w:rPr><w:sz w:val="20"/><w:lang w:fareast="EN-US"/></w:rPr></w:pPr><w:r wsp:rsidRPr="00CB078B"><w:rPr><w:sz w:val="20"/><w:lang w:fareast="EN-US"/></w:rPr><w:t>ns</w:t></w:r></w:p></w:tc><w:tc><w:tcPr><w:tcW w:w="852" w:type="dxa"/></w:tcPr><w:p wsp:rsidR="005B5E1E" wsp:rsidRPr="00CB078B" wsp:rsidRDefault="005B5E1E" wsp:rsidP="00EB653E"><w:pPr><w:rPr><w:sz w:val="20"/><w:lang w:fareast="EN-US"/></w:rPr></w:pPr><w:r wsp:rsidRPr="00CB078B"><w:rPr><w:sz w:val="20"/><w:lang w:fareast="EN-US"/></w:rPr><w:t>P&gt;0.05</w:t></w:r></w:p></w:tc></w:tr><w:tr wsp:rsidR="005B5E1E" wsp:rsidRPr="00E434D3" wsp:rsidTr="00EB653E"><w:trPr><w:tblHeader/><w:jc w:val="center"/></w:trPr><w:tc><w:tcPr><w:tcW w:w="1463" w:type="dxa"/></w:tcPr><w:p wsp:rsidR="005B5E1E" wsp:rsidRPr="00CB078B" wsp:rsidRDefault="005B5E1E" wsp:rsidP="00EB653E"><w:pPr><w:ind w:first-line="284"/><w:rPr><w:i/><w:sz w:val="20"/><w:lang w:fareast="EN-US"/></w:rPr></w:pPr><w:r><w:rPr><w:i/><w:sz w:val="20"/><w:lang w:fareast="EN-US"/></w:rPr><w:t>SV vs. SS</w:t></w:r></w:p></w:tc><w:tc><w:tcPr><w:tcW w:w="1134" w:type="dxa"/></w:tcPr><w:p wsp:rsidR="005B5E1E" wsp:rsidRPr="00CB078B" wsp:rsidRDefault="005B5E1E" wsp:rsidP="00EB653E"><w:pPr><w:ind w:first-line="284"/><w:rPr><w:sz w:val="20"/><w:lang w:fareast="EN-US"/></w:rPr></w:pPr><w:r wsp:rsidRPr="00CB078B"><w:rPr><w:sz w:val="20"/><w:lang w:fareast="EN-US"/></w:rPr><w:t>ns</w:t></w:r></w:p></w:tc><w:tc><w:tcPr><w:tcW w:w="851" w:type="dxa"/></w:tcPr><w:p wsp:rsidR="005B5E1E" wsp:rsidRPr="00CB078B" wsp:rsidRDefault="005B5E1E" wsp:rsidP="00EB653E"><w:pPr><w:rPr><w:sz w:val="20"/><w:lang w:fareast="EN-US"/></w:rPr></w:pPr><w:r wsp:rsidRPr="00CB078B"><w:rPr><w:sz w:val="20"/><w:lang w:fareast="EN-US"/></w:rPr><w:t>P&gt;0.05</w:t></w:r></w:p></w:tc><w:tc><w:tcPr><w:tcW w:w="1134" w:type="dxa"/></w:tcPr><w:p wsp:rsidR="005B5E1E" wsp:rsidRPr="00CB078B" wsp:rsidRDefault="005B5E1E" wsp:rsidP="00EB653E"><w:pPr><w:ind w:first-line="284"/><w:rPr><w:sz w:val="20"/><w:lang w:fareast="EN-US"/></w:rPr></w:pPr><w:r wsp:rsidRPr="00CB078B"><w:rPr><w:sz w:val="20"/><w:lang w:fareast="EN-US"/></w:rPr><w:t>ns</w:t></w:r></w:p></w:tc><w:tc><w:tcPr><w:tcW w:w="850" w:type="dxa"/></w:tcPr><w:p wsp:rsidR="005B5E1E" wsp:rsidRPr="00CB078B" wsp:rsidRDefault="005B5E1E" wsp:rsidP="00EB653E"><w:pPr><w:rPr><w:sz w:val="20"/><w:lang w:fareast="EN-US"/></w:rPr></w:pPr><w:r wsp:rsidRPr="00CB078B"><w:rPr><w:sz w:val="20"/><w:lang w:fareast="EN-US"/></w:rPr><w:t>P&gt;0.05</w:t></w:r></w:p></w:tc><w:tc><w:tcPr><w:tcW w:w="1134" w:type="dxa"/></w:tcPr><w:p wsp:rsidR="005B5E1E" wsp:rsidRPr="00CB078B" wsp:rsidRDefault="005B5E1E" wsp:rsidP="00EB653E"><w:pPr><w:ind w:first-line="284"/><w:rPr><w:sz w:val="20"/><w:lang w:fareast="EN-US"/></w:rPr></w:pPr><w:r wsp:rsidRPr="00CB078B"><w:rPr><w:sz w:val="20"/><w:lang w:fareast="EN-US"/></w:rPr><w:t>ns</w:t></w:r></w:p></w:tc><w:tc><w:tcPr><w:tcW w:w="851" w:type="dxa"/></w:tcPr><w:p wsp:rsidR="005B5E1E" wsp:rsidRPr="00CB078B" wsp:rsidRDefault="005B5E1E" wsp:rsidP="00EB653E"><w:pPr><w:rPr><w:sz w:val="20"/><w:lang w:fareast="EN-US"/></w:rPr></w:pPr><w:r wsp:rsidRPr="00CB078B"><w:rPr><w:sz w:val="20"/><w:lang w:fareast="EN-US"/></w:rPr><w:t>P&gt;0.05</w:t></w:r></w:p></w:tc><w:tc><w:tcPr><w:tcW w:w="1134" w:type="dxa"/></w:tcPr><w:p wsp:rsidR="005B5E1E" wsp:rsidRPr="00CB078B" wsp:rsidRDefault="005B5E1E" wsp:rsidP="00EB653E"><w:pPr><w:ind w:first-line="284"/><w:rPr><w:sz w:val="20"/><w:lang w:fareast="EN-US"/></w:rPr></w:pPr><w:r wsp:rsidRPr="00CB078B"><w:rPr><w:sz w:val="20"/><w:lang w:fareast="EN-US"/></w:rPr><w:t>ns</w:t></w:r></w:p></w:tc><w:tc><w:tcPr><w:tcW w:w="852" w:type="dxa"/></w:tcPr><w:p wsp:rsidR="005B5E1E" wsp:rsidRPr="00CB078B" wsp:rsidRDefault="005B5E1E" wsp:rsidP="00EB653E"><w:pPr><w:rPr><w:sz w:val="20"/><w:lang w:fareast="EN-US"/></w:rPr></w:pPr><w:r wsp:rsidRPr="00CB078B"><w:rPr><w:sz w:val="20"/><w:lang w:fareast="EN-US"/></w:rPr><w:t>P&gt;0.05</w:t></w:r></w:p></w:tc></w:tr><w:tr wsp:rsidR="005B5E1E" wsp:rsidRPr="00E434D3" wsp:rsidTr="00EB653E"><w:trPr><w:tblHeader/><w:jc w:val="center"/></w:trPr><w:tc><w:tcPr><w:tcW w:w="1463" w:type="dxa"/></w:tcPr><w:p wsp:rsidR="005B5E1E" wsp:rsidRPr="00B36BBA" wsp:rsidRDefault="005B5E1E" wsp:rsidP="00EB653E"><w:pPr><w:ind w:first-line="284"/><w:rPr><w:i/><w:sz w:val="20"/><w:lang w:fareast="EN-US"/></w:rPr></w:pPr><w:r><w:rPr><w:i/><w:sz w:val="20"/><w:lang w:fareast="EN-US"/></w:rPr><w:t>SV vs. IB</w:t></w:r></w:p></w:tc><w:tc><w:tcPr><w:tcW w:w="1134" w:type="dxa"/></w:tcPr><w:p wsp:rsidR="005B5E1E" wsp:rsidRPr="00CB078B" wsp:rsidRDefault="005B5E1E" wsp:rsidP="00EB653E"><w:pPr><w:ind w:first-line="284"/><w:rPr><w:sz w:val="20"/><w:lang w:fareast="EN-US"/></w:rPr></w:pPr><w:r wsp:rsidRPr="00CB078B"><w:rPr><w:sz w:val="20"/><w:lang w:fareast="EN-US"/></w:rPr><w:t>ns</w:t></w:r></w:p></w:tc><w:tc><w:tcPr><w:tcW w:w="851" w:type="dxa"/></w:tcPr><w:p wsp:rsidR="005B5E1E" wsp:rsidRPr="00CB078B" wsp:rsidRDefault="005B5E1E" wsp:rsidP="00EB653E"><w:pPr><w:rPr><w:sz w:val="20"/><w:lang w:fareast="EN-US"/></w:rPr></w:pPr><w:r wsp:rsidRPr="00CB078B"><w:rPr><w:sz w:val="20"/><w:lang w:fareast="EN-US"/></w:rPr><w:t>P&gt;0.05</w:t></w:r></w:p></w:tc><w:tc><w:tcPr><w:tcW w:w="1134" w:type="dxa"/></w:tcPr><w:p wsp:rsidR="005B5E1E" wsp:rsidRPr="00CB078B" wsp:rsidRDefault="005B5E1E" wsp:rsidP="00EB653E"><w:pPr><w:ind w:first-line="284"/><w:rPr><w:sz w:val="20"/><w:lang w:fareast="EN-US"/></w:rPr></w:pPr><w:r wsp:rsidRPr="00CB078B"><w:rPr><w:sz w:val="20"/><w:lang w:fareast="EN-US"/></w:rPr><w:t>ns</w:t></w:r></w:p></w:tc><w:tc><w:tcPr><w:tcW w:w="850" w:type="dxa"/></w:tcPr><w:p wsp:rsidR="005B5E1E" wsp:rsidRPr="00CB078B" wsp:rsidRDefault="005B5E1E" wsp:rsidP="00EB653E"><w:pPr><w:rPr><w:sz w:val="20"/><w:lang w:fareast="EN-US"/></w:rPr></w:pPr><w:r wsp:rsidRPr="00CB078B"><w:rPr><w:sz w:val="20"/><w:lang w:fareast="EN-US"/></w:rPr><w:t>P&gt;0.05</w:t></w:r></w:p></w:tc><w:tc><w:tcPr><w:tcW w:w="1134" w:type="dxa"/></w:tcPr><w:p wsp:rsidR="005B5E1E" wsp:rsidRPr="00CB078B" wsp:rsidRDefault="005B5E1E" wsp:rsidP="00EB653E"><w:pPr><w:ind w:first-line="284"/><w:rPr><w:sz w:val="20"/><w:lang w:fareast="EN-US"/></w:rPr></w:pPr><w:r wsp:rsidRPr="00CB078B"><w:rPr><w:sz w:val="20"/><w:lang w:fareast="EN-US"/></w:rPr><w:t>ns</w:t></w:r></w:p></w:tc><w:tc><w:tcPr><w:tcW w:w="851" w:type="dxa"/></w:tcPr><w:p wsp:rsidR="005B5E1E" wsp:rsidRPr="00CB078B" wsp:rsidRDefault="005B5E1E" wsp:rsidP="00EB653E"><w:pPr><w:rPr><w:sz w:val="20"/><w:lang w:fareast="EN-US"/></w:rPr></w:pPr><w:r wsp:rsidRPr="00CB078B"><w:rPr><w:sz w:val="20"/><w:lang w:fareast="EN-US"/></w:rPr><w:t>P&gt;0.05</w:t></w:r></w:p></w:tc><w:tc><w:tcPr><w:tcW w:w="1134" w:type="dxa"/></w:tcPr><w:p wsp:rsidR="005B5E1E" wsp:rsidRPr="00CB078B" wsp:rsidRDefault="005B5E1E" wsp:rsidP="00EB653E"><w:pPr><w:ind w:first-line="284"/><w:rPr><w:sz w:val="20"/><w:lang w:fareast="EN-US"/></w:rPr></w:pPr><w:r wsp:rsidRPr="00CB078B"><w:rPr><w:sz w:val="20"/><w:lang w:fareast="EN-US"/></w:rPr><w:t>ns</w:t></w:r></w:p></w:tc><w:tc><w:tcPr><w:tcW w:w="852" w:type="dxa"/></w:tcPr><w:p wsp:rsidR="005B5E1E" wsp:rsidRPr="00CB078B" wsp:rsidRDefault="005B5E1E" wsp:rsidP="00EB653E"><w:pPr><w:rPr><w:sz w:val="20"/><w:lang w:fareast="EN-US"/></w:rPr></w:pPr><w:r wsp:rsidRPr="00CB078B"><w:rPr><w:sz w:val="20"/><w:lang w:fareast="EN-US"/></w:rPr><w:t>P&gt;0.05</w:t></w:r></w:p></w:tc></w:tr><w:tr wsp:rsidR="005B5E1E" wsp:rsidRPr="00E434D3" wsp:rsidTr="00EB653E"><w:trPr><w:tblHeader/><w:jc w:val="center"/></w:trPr><w:tc><w:tcPr><w:tcW w:w="1463" w:type="dxa"/></w:tcPr><w:p wsp:rsidR="005B5E1E" wsp:rsidRPr="00B36BBA" wsp:rsidRDefault="005B5E1E" wsp:rsidP="00EB653E"><w:pPr><w:ind w:first-line="284"/><w:rPr><w:i/><w:sz w:val="20"/><w:lang w:fareast="EN-US"/></w:rPr></w:pPr><w:r><w:rPr><w:i/><w:sz w:val="20"/><w:lang w:fareast="EN-US"/></w:rPr><w:t>SS vs. IB</w:t></w:r></w:p></w:tc><w:tc><w:tcPr><w:tcW w:w="1134" w:type="dxa"/></w:tcPr><w:p wsp:rsidR="005B5E1E" wsp:rsidRPr="00CB078B" wsp:rsidRDefault="005B5E1E" wsp:rsidP="00EB653E"><w:pPr><w:ind w:first-line="284"/><w:rPr><w:sz w:val="20"/><w:lang w:fareast="EN-US"/></w:rPr></w:pPr><w:r wsp:rsidRPr="00CB078B"><w:rPr><w:sz w:val="20"/><w:lang w:fareast="EN-US"/></w:rPr><w:t>ns</w:t></w:r></w:p></w:tc><w:tc><w:tcPr><w:tcW w:w="851" w:type="dxa"/></w:tcPr><w:p wsp:rsidR="005B5E1E" wsp:rsidRPr="00CB078B" wsp:rsidRDefault="005B5E1E" wsp:rsidP="00EB653E"><w:pPr><w:rPr><w:sz w:val="20"/><w:lang w:fareast="EN-US"/></w:rPr></w:pPr><w:r wsp:rsidRPr="00CB078B"><w:rPr><w:sz w:val="20"/><w:lang w:fareast="EN-US"/></w:rPr><w:t>P&gt;0.05</w:t></w:r></w:p></w:tc><w:tc><w:tcPr><w:tcW w:w="1134" w:type="dxa"/></w:tcPr><w:p wsp:rsidR="005B5E1E" wsp:rsidRPr="00CB078B" wsp:rsidRDefault="005B5E1E" wsp:rsidP="00EB653E"><w:pPr><w:ind w:first-line="284"/><w:rPr><w:sz w:val="20"/><w:lang w:fareast="EN-US"/></w:rPr></w:pPr><w:r wsp:rsidRPr="00CB078B"><w:rPr><w:sz w:val="20"/><w:lang w:fareast="EN-US"/></w:rPr><w:t>ns</w:t></w:r></w:p></w:tc><w:tc><w:tcPr><w:tcW w:w="850" w:type="dxa"/></w:tcPr><w:p wsp:rsidR="005B5E1E" wsp:rsidRPr="00CB078B" wsp:rsidRDefault="005B5E1E" wsp:rsidP="00EB653E"><w:pPr><w:rPr><w:sz w:val="20"/><w:lang w:fareast="EN-US"/></w:rPr></w:pPr><w:r wsp:rsidRPr="00CB078B"><w:rPr><w:sz w:val="20"/><w:lang w:fareast="EN-US"/></w:rPr><w:t>P&gt;0.05</w:t></w:r></w:p></w:tc><w:tc><w:tcPr><w:tcW w:w="1134" w:type="dxa"/></w:tcPr><w:p wsp:rsidR="005B5E1E" wsp:rsidRPr="00CB078B" wsp:rsidRDefault="005B5E1E" wsp:rsidP="00EB653E"><w:pPr><w:ind w:first-line="284"/><w:rPr><w:sz w:val="20"/><w:lang w:fareast="EN-US"/></w:rPr></w:pPr><w:r wsp:rsidRPr="00CB078B"><w:rPr><w:sz w:val="20"/><w:lang w:fareast="EN-US"/></w:rPr><w:t>ns</w:t></w:r></w:p></w:tc><w:tc><w:tcPr><w:tcW w:w="851" w:type="dxa"/></w:tcPr><w:p wsp:rsidR="005B5E1E" wsp:rsidRPr="00CB078B" wsp:rsidRDefault="005B5E1E" wsp:rsidP="00EB653E"><w:pPr><w:rPr><w:sz w:val="20"/><w:lang w:fareast="EN-US"/></w:rPr></w:pPr><w:r wsp:rsidRPr="00CB078B"><w:rPr><w:sz w:val="20"/><w:lang w:fareast="EN-US"/></w:rPr><w:t>P&gt;0.05</w:t></w:r></w:p></w:tc><w:tc><w:tcPr><w:tcW w:w="1134" w:type="dxa"/></w:tcPr><w:p wsp:rsidR="005B5E1E" wsp:rsidRPr="00CB078B" wsp:rsidRDefault="005B5E1E" wsp:rsidP="00EB653E"><w:pPr><w:ind w:first-line="284"/><w:rPr><w:sz w:val="20"/><w:lang w:fareast="EN-US"/></w:rPr></w:pPr><w:r wsp:rsidRPr="00CB078B"><w:rPr><w:sz w:val="20"/><w:lang w:fareast="EN-US"/></w:rPr><w:t>ns</w:t></w:r></w:p></w:tc><w:tc><w:tcPr><w:tcW w:w="852" w:type="dxa"/></w:tcPr><w:p wsp:rsidR="005B5E1E" wsp:rsidRPr="00CB078B" wsp:rsidRDefault="005B5E1E" wsp:rsidP="00EB653E"><w:pPr><w:rPr><w:sz w:val="20"/><w:lang w:fareast="EN-US"/></w:rPr></w:pPr><w:r wsp:rsidRPr="00CB078B"><w:rPr><w:sz w:val="20"/><w:lang w:fareast="EN-US"/></w:rPr><w:t>P&gt;0.05</w:t></w:r></w:p></w:tc></w:tr></w:tbl><w:p wsp:rsidR="005B5E1E" wsp:rsidRPr="00E85685" wsp:rsidRDefault="005B5E1E" wsp:rsidP="005B5E1E"><w:pPr><w:rPr><w:b/><w:lang w:fareast="EN-US"/></w:rPr></w:pPr><w:r wsp:rsidRPr="00E85685"><w:rPr><w:i/><w:sz w:val="20"/><w:lang w:fareast="EN-US"/></w:rPr><w:t>VU = V. unguiculata, CM = C. maxima, AH = A. hybridus,</w:t></w:r><w:r><w:rPr><w:i/><w:sz w:val="20"/><w:lang w:fareast="EN-US"/></w:rPr><w:t> </w:t></w:r><w:r wsp:rsidR="00577B9C"><w:rPr><w:i/><w:sz w:val="20"/><w:lang w:fareast="EN-US"/></w:rPr><w:t>AS = A</w:t></w:r><w:r wsp:rsidR="00577B9C" wsp:rsidRPr="00577B9C"><w:rPr><w:sz w:val="20"/><w:lang w:fareast="EN-US"/></w:rPr><w:t>. sp</w:t></w:r><w:r wsp:rsidRPr="00E85685"><w:rPr><w:i/><w:sz w:val="20"/><w:lang w:fareast="EN-US"/></w:rPr><w:t>, SV = S. villosum, SS = S. scabrum, IB = I. batatas</w:t></w:r><w:r wsp:rsidRPr="00E85685"><w:rPr><w:lang w:fareast="EN-US"/></w:rPr><w:t>,</w:t></w:r><w:r wsp:rsidRPr="00E85685"><w:rPr><w:b/><w:lang w:fareast="EN-US"/></w:rPr><w:t> </w:t></w:r><w:r wsp:rsidRPr="00CB078B"><w:rPr><w:sz w:val="20"/><w:lang w:fareast="EN-US"/></w:rPr><w:t>** = very significant difference (P&lt;0.01), * = significant difference (P&lt;0.05), ns = no significant difference (P&gt;0.05), KW = Kruskal-Wallis Statistics</w:t></w:r></w:p><w:p wsp:rsidR="00C6726F" wsp:rsidRDefault="00C6726F"/><w:sectPr wsp:rsidR="00C6726F"><w:ftr w:type="odd"><w:p wsp:rsidR="009860D5" wsp:rsidRDefault="009860D5"><w:pPr><w:pStyle w:val="Footer"/><w:jc w:val="center"/></w:pPr><w:r><w:t>S</w:t></w:r><w:r><w:fldChar w:fldCharType="begin"/></w:r><w:r><w:instrText>PAGE   \* MERGEFORMAT</w:instrText></w:r><w:r><w:fldChar w:fldCharType="separate"/></w:r><w:r wsp:rsidR="006C0AF5" wsp:rsidRPr="006C0AF5"><w:rPr><w:noProof/><w:lang w:val="SV"/></w:rPr><w:t>1</w:t></w:r><w:r><w:fldChar w:fldCharType="end"/></w:r></w:p><w:p wsp:rsidR="009860D5" wsp:rsidRDefault="009860D5"><w:pPr><w:pStyle w:val="Footer"/></w:pPr></w:p></w:ftr><w:pgSz w:w="11906" w:h="16838"/><w:pgMar w:top="1417" w:right="1417" w:bottom="1417" w:left="1417" w:header="708" w:footer="708" w:gutter="0"/><w:cols w:space="708"/><w:docGrid w:line-pitch="360"/></w:sectPr></wx:sect></w:body></w:wordDocument>
